# Supplementary material for: Methanol as a formylating agent in nitrogen heterocycles
Source: Royal Society of Chemistry journal article supplement (doi:10.1039/d1ob01807h), 2021-01-01

## Supporting Information

# Methanol as a Formylating Agent in Nitrogen Heterocycles

Zhengbao Xu,<sup>a,b\*</sup> and Lizhi Zhang<sup>c\*</sup>

<sup>a</sup> Institute of Biomedical Research, Shandong University of Technology, Zibo 255000, Shandong, People's Republic of China.

<sup>b</sup> Zibo Key Laboratory of New Drug Development of Neurodegenerative diseases, School of Life Sciences and medicine, Shandong University of Technology, Zibo 255000, Shandong, People's Republic of China.

<sup>c</sup> School of Chemistry and Chemical Engineering, Shandong University of Technology, Zibo 255000, Shandong, People's Republic of China.

E-mail: [1208241003@qq.com](mailto:1208241003@qq.com)

|                                                                 |             |
|-----------------------------------------------------------------|-------------|
| <b>General Information.....</b>                                 | <b>1</b>    |
| <b>Typical procedure.....</b>                                   | <b>2</b>    |
| <b>The modification of the reaction condition.....</b>          | <b>2-5</b>  |
| <b>Copies of the <sup>1</sup>H NMR, <sup>13</sup>C NMR.....</b> | <b>6-33</b> |

### General Information

<sup>1</sup>H and <sup>13</sup>C NMR spectra were recorded on a Bruker advance III 400 spectrometer in CDCl<sub>3</sub> with TMS as internal standard. Mass spectra were determined on a Hewlett Packard 5988A spectrometer by direct inlet at 70 eV. High-resolution mass spectral analysis (HRMS) data were measured on a Bruker Apex II. All products were identified by <sup>1</sup>H and <sup>13</sup>C NMR, MS, HRMS. The starting materials were purchased from Aldrich, Energy Chemical, Acros Organics, J&K Chemicals or TCI and used without further purification.

## Typical procedure

A mixture of 4-methylquinoline (1 equiv., 0.2 mmol), Fe(acac)<sub>3</sub> (3%, 0.006 mmol), TBHP (2 equiv., 0.4 mmol), acetic acid (2.0 equiv., 0.4 mmol) and methanol (2 mL) was heated at 110°C for 9 h. After the reaction finished, the mixture was evaporated under vacuum and purified by column chromatography to afford the desired product.

## The modification of the reaction condition

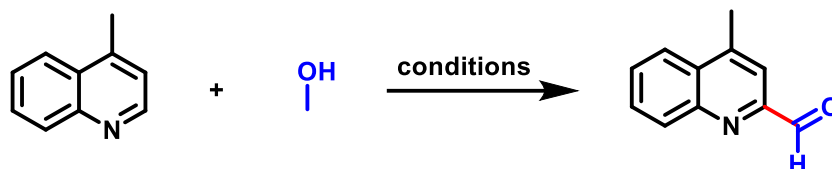

Substrate: 0.2 mmol (1 equiv.);

TBHP: *t*-BuOOH; DTBP: (*t*-BuO)<sub>2</sub>

| Entry | Methanol (mL) | Initiator (equiv.) | Catalyst (mol %)          | T (°C) | Time (h) | Yield (%) |
|-------|---------------|--------------------|---------------------------|--------|----------|-----------|
| 1     | 2             | TBHP (2)           | Fe(acac) <sub>3</sub> (3) | 80     | 9        | NR        |
| 2     | 2             | TBHP (2)           | Fe(acac) <sub>3</sub> (3) | 90     | 9        | 16        |
| 3     | 2             | TBHP (2)           | Fe(acac) <sub>3</sub> (3) | 100    | 9        | 47        |
| 4     | 2             | TBHP (2)           | Fe(acac) <sub>3</sub> (3) | 110    | 9        | 76        |
| 5     | 2             | TBHP (2)           | Fe(acac) <sub>3</sub> (3) | 120    | 9        | 72        |
| 6     | 2             | TBHP (2)           | Fe(acac) <sub>3</sub> (3) | 130    | 9        | 43        |
| 7     | 2             | TBHP (2)           | -                         | 110    | 9        | trace     |
| 8     | 3             | TBHP (2)           | Cu (3)                    | 110    | 9        | trace     |
| 9     | 3             | TBHP (2)           | CuCl (3)                  | 110    | 9        | trace     |
| 10    | 3             | TBHP (2)           | CuBr (3)                  | 110    | 9        | trace     |

|    |   |          |                                               |     |   |       |
|----|---|----------|-----------------------------------------------|-----|---|-------|
| 11 | 3 | TBHP (2) | CuI (3)                                       | 110 | 9 | trace |
| 12 | 3 | TBHP (2) | Cu <sub>2</sub> O (3)                         | 110 | 9 | trace |
| 13 | 3 | TBHP (2) | CuBr <sub>2</sub> (3)                         | 110 | 9 | trace |
| 14 | 3 | TBHP (2) | Cu(AcO) <sub>2</sub><br>·H <sub>2</sub> O (3) | 110 | 9 | trace |
| 15 | 3 | TBHP (2) | Cu(acac) <sub>2</sub><br>(3)                  | 110 | 9 | trace |
| 16 | 3 | TBHP (2) | Mn(acac) <sub>2</sub><br>(3)                  | 110 | 9 | trace |
| 17 | 3 | TBHP (2) | Ni(acac) <sub>2</sub><br>(3)                  | 110 | 9 | trace |
| 18 | 3 | TBHP (2) | Pd(acac) <sub>2</sub><br>(3)                  | 110 | 9 | trace |
| 19 | 3 | TBHP (2) | AgNO <sub>3</sub> (3)                         | 110 | 9 | trace |
| 20 | 3 | TBHP (2) | FeCl <sub>2</sub> (3)                         | 110 | 9 | trace |
| 21 | 3 | TBHP (2) | Fe(OTf) <sub>2</sub><br>(3)                   | 110 | 9 | 58    |
| 22 | 3 | TBHP (2) | Fe(AcO) <sub>2</sub><br>(3)                   | 110 | 9 | 65    |
| 23 | 3 | TBHP (2) | Fe(acac) <sub>2</sub><br>(3)                  | 110 | 9 | 72    |
| 24 | 3 | TBHP (2) | FeCl <sub>3</sub> ·<br>6H <sub>2</sub> O (3)  | 110 | 9 | 52    |
| 25 | 3 | TBHP (2) | Fe(OTf) <sub>3</sub><br>(3)                   | 110 | 9 | 60    |
| 26 | 3 | TBHP (2) | Fe(AcO) <sub>3</sub><br>(3)                   | 110 | 9 | 68    |
| 27 | 4 | TBHP (2) | FeNO <sub>3</sub> ·<br>9H <sub>2</sub> O (3)  | 110 | 9 | 32    |

|           |          |                                                  |                                           |            |          |           |
|-----------|----------|--------------------------------------------------|-------------------------------------------|------------|----------|-----------|
| 28        | 2        | DTBP (2)                                         | Fe(acac) <sub>3</sub><br>(3)              | 110        | 9        | trace     |
| 29        | 1        | DCP (2)                                          | Fe(acac) <sub>3</sub><br>(3)              | 110        | 9        | trace     |
| 30        | 2        | K <sub>2</sub> S <sub>2</sub> O <sub>8</sub> (2) | Fe(acac) <sub>3</sub><br>(3)              | 110        | 9        | trace     |
| 31        | 2        | TBHP (1)                                         | Fe(acac) <sub>3</sub><br>(3)              | 110        | 9        | 58        |
| 32        | 2        | TBHP (3)                                         | Fe(acac) <sub>3</sub><br>(3)              | 110        | 9        | 70        |
| 33        | 2        | TBHP (2)                                         | Fe(acac) <sub>3</sub><br>(1)              | 110        | 9        | 67        |
| 34        | 2        | TBHP (2)                                         | Fe(acac) <sub>3</sub><br>(5)              | 110        | 9        | 73        |
| 35        | 1        | TBHP (2)                                         | Fe(acac) <sub>3</sub><br>(3)              | 110        | 9        | 57        |
| 36        | 3        | TBHP (2)                                         | Fe(acac) <sub>3</sub><br>(3)              | 110        | 9        | 63        |
| 37        | 5        | TBHP (2)                                         | Fe(acac) <sub>3</sub><br>(3)              | 110        | 9        | 54        |
| 38        | 2        | TBHP (2)                                         | Fe(acac) <sub>3</sub><br>(3)              | 110        | 6        | 62        |
| 39        | 2        | TBHP (2)                                         | Fe(acac) <sub>3</sub><br>(3)              | 110        | 12       | 67        |
| <b>40</b> | <b>2</b> | <b>TBHP (2)</b><br><b>AcOH (2)</b>               | <b>Fe(acac)<sub>3</sub></b><br><b>(3)</b> | <b>110</b> | <b>9</b> | <b>82</b> |
| 41        | 2        | TBHP (2)<br>CF <sub>3</sub> COOH<br>(2)          | Fe(acac) <sub>3</sub><br>(3)              | 110        | 9        | 73        |

|    |                                                          |                      |                              |     |   |    |
|----|----------------------------------------------------------|----------------------|------------------------------|-----|---|----|
| 42 | PhMe<br>(1 mL)<br>CH <sub>3</sub> OH<br>(1 mL)           | TBHP (2)<br>AcOH (2) | Fe(acac) <sub>3</sub><br>(3) | 110 | 9 | 43 |
| 43 | EA<br>(1 mL)<br>CH <sub>3</sub> OH<br>(1 mL)             | TBHP (2)<br>AcOH (2) | Fe(acac) <sub>3</sub><br>(3) | 110 | 9 | 56 |
| 44 | <i>t</i> -BuOH<br>(1 mL)<br>CH <sub>3</sub> OH<br>(1 mL) | TBHP (2)<br>AcOH (2) | Fe(acac) <sub>3</sub><br>(3) | 110 | 9 | 60 |

#### Physical data and references for the following products

All known compounds are determined by <sup>1</sup>H NMR and <sup>13</sup>C NMR, MS analysis and compared with which were cited in the following references<sup>[1-4]</sup> and the new compounds were further confirmed by HRMS.

#### References:

1. J. Dong, X. Wang, H. Song, Y. Liu, Q. Wang, *Adv. Synth. Catal.*, 2020, **362**, 2155.
2. Q. Wang, K. Xu, Y. Jiang, Y. Liu, B. Sun, C. Zeng, *Org. Lett.*, 2017, **19**, 5517.
3. L. Zhou, N. Okugawa, H. Togo, *Eur. J. Org. Chem.*, 2017, **41**, 6239.
4. Y. Liu, B. Jiang, W. Zhang, Z. Xu, *J. Org. Chem.*, 2013, **78**, 966.
5. L. Jiang, Y. Huang, Y. Yan, Y. Xie, *Tetrahedron Lett.*, 2016, **57**, 4149.
6. Y. Wu, P. Guo, L. Chen, W. Duan, Z. Yang, T. Wang, T. Chen, F. Xiong, *Chem. Commun.*, 2021, **57**, 3271.
7. W. Jia, Y. Jian, B. Huang, C. Yang, W. Xia, *Synlett.*, 2018, **29**, 1881.

# Copies of the $^1\text{H}$ NMR, $^{13}\text{C}$ NMR

## 1- $^1\text{H}$ NMR

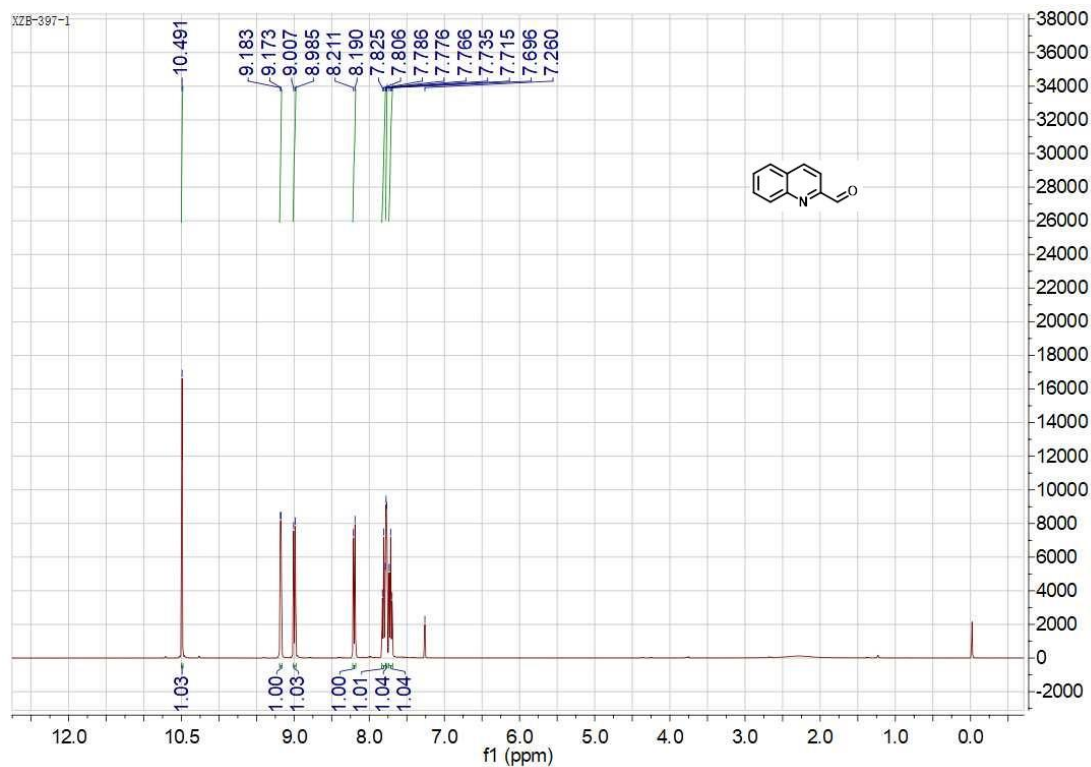

## 1- $^{13}\text{C}$ NMR

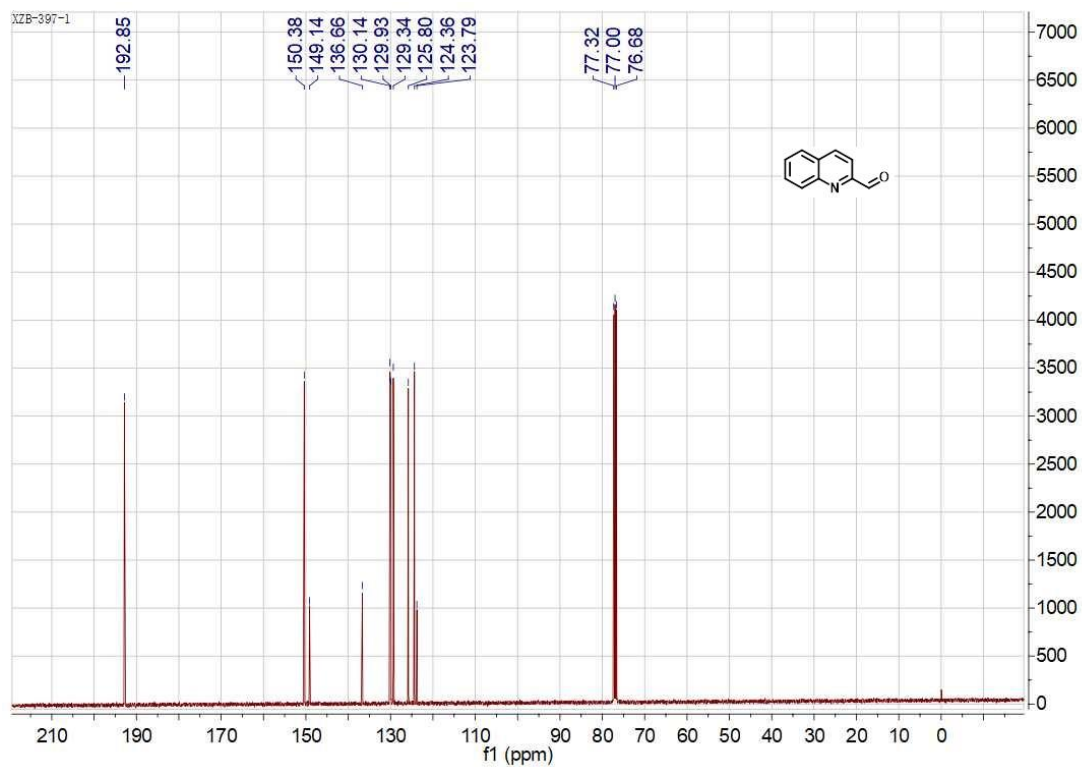

## 2-<sup>1</sup>H NMR

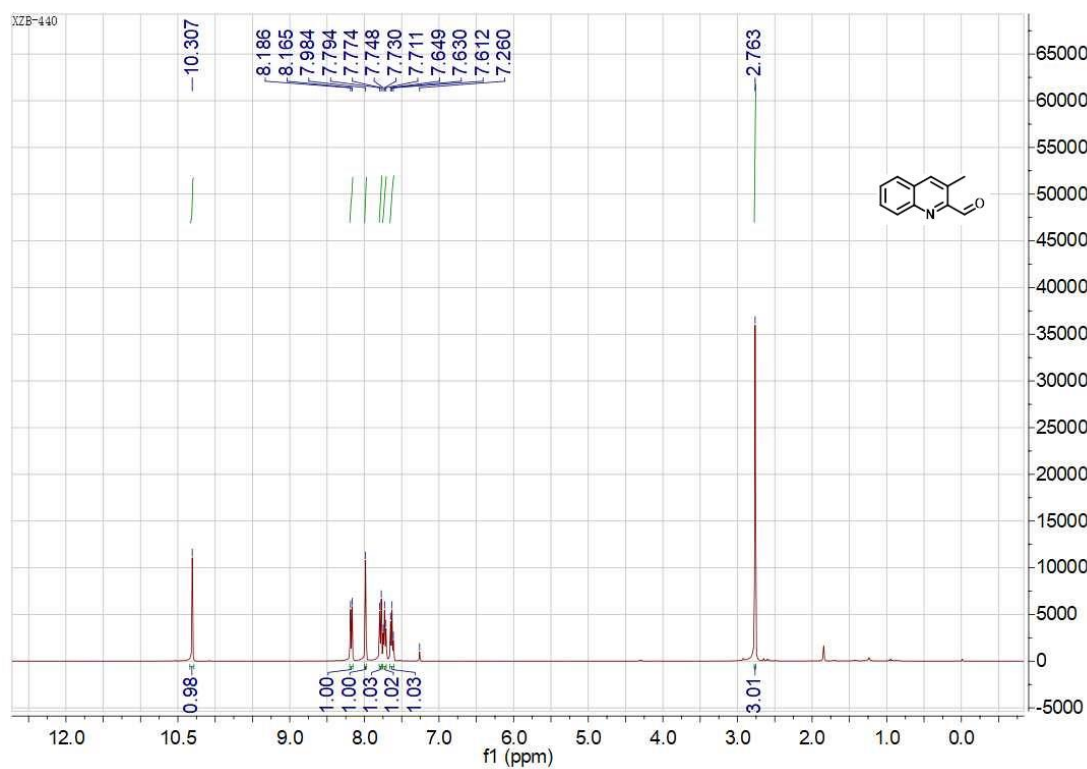

## 2-<sup>13</sup>C NMR

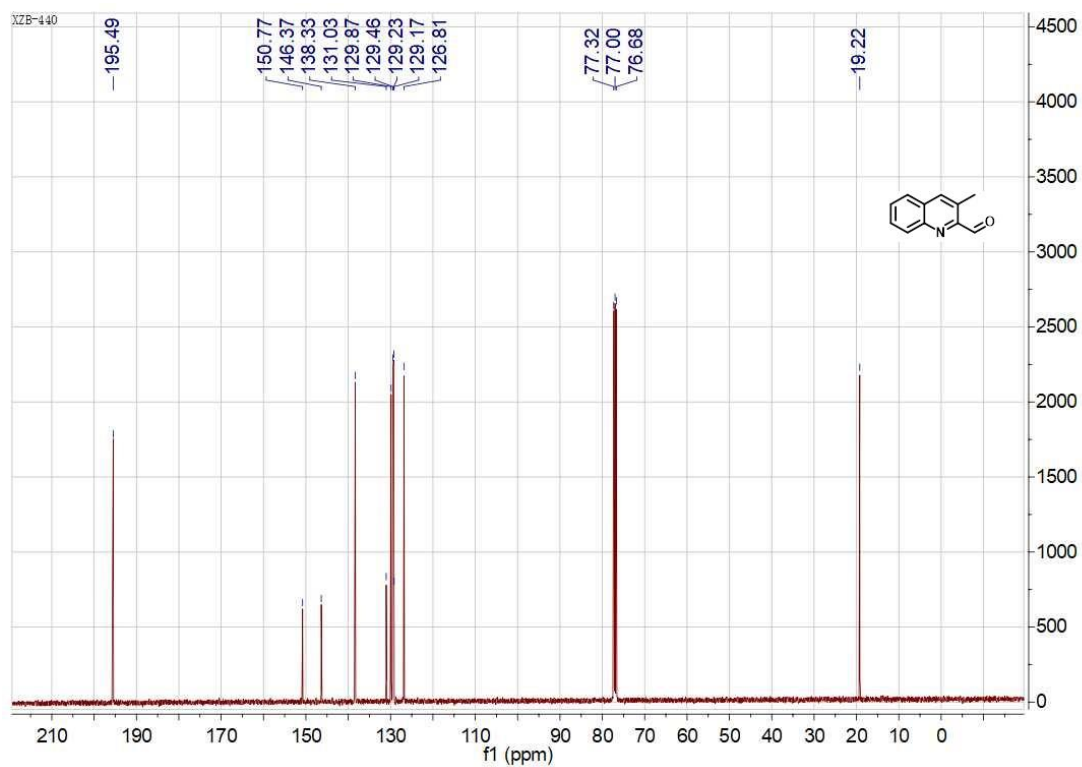

### $^1\text{H}$ NMR

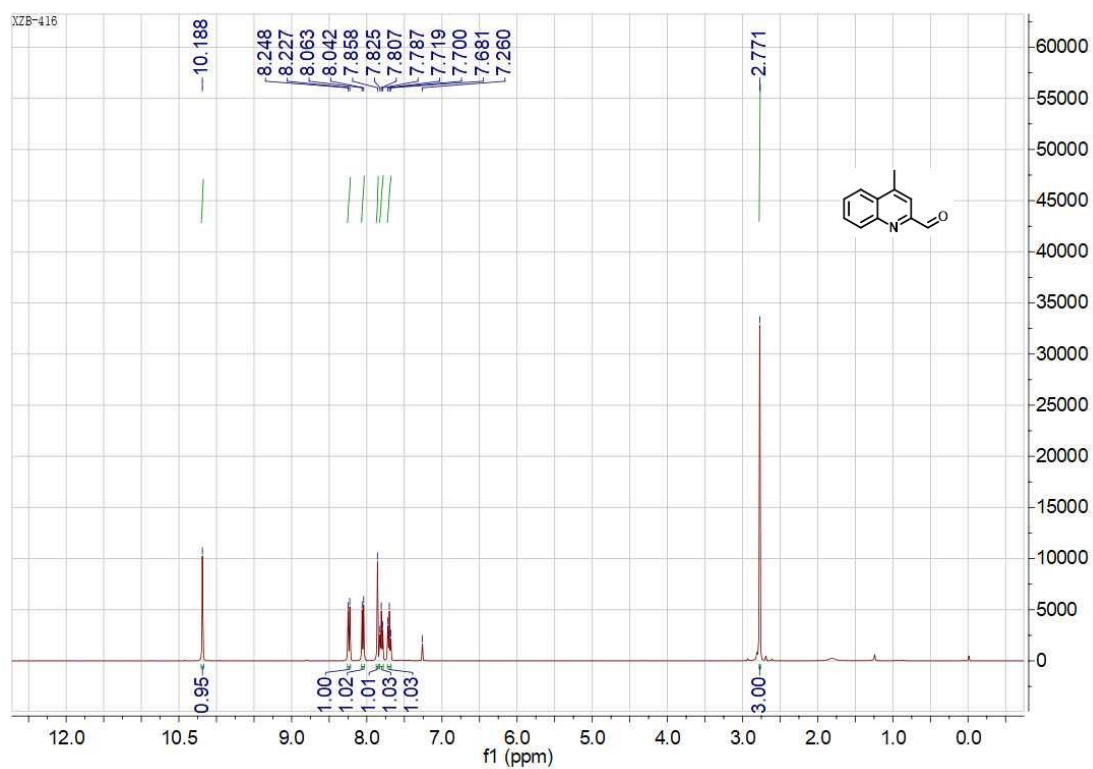

### $^{13}\text{C}$ NMR

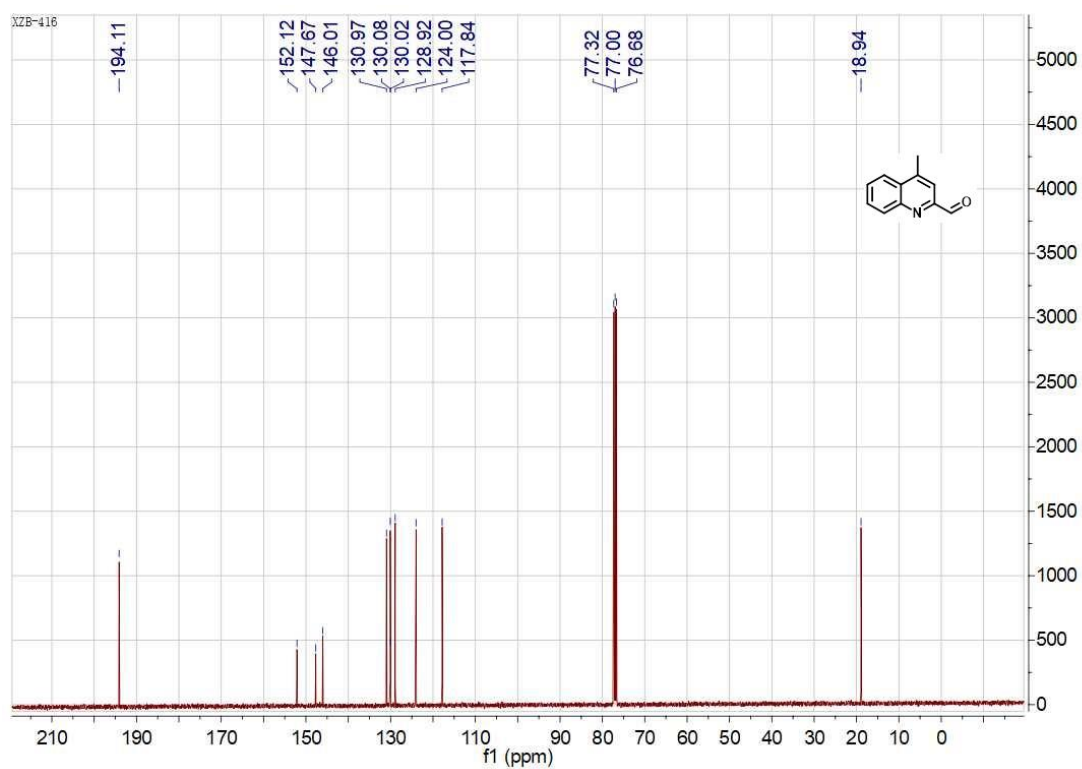



## 4-<sup>1</sup>H NMR

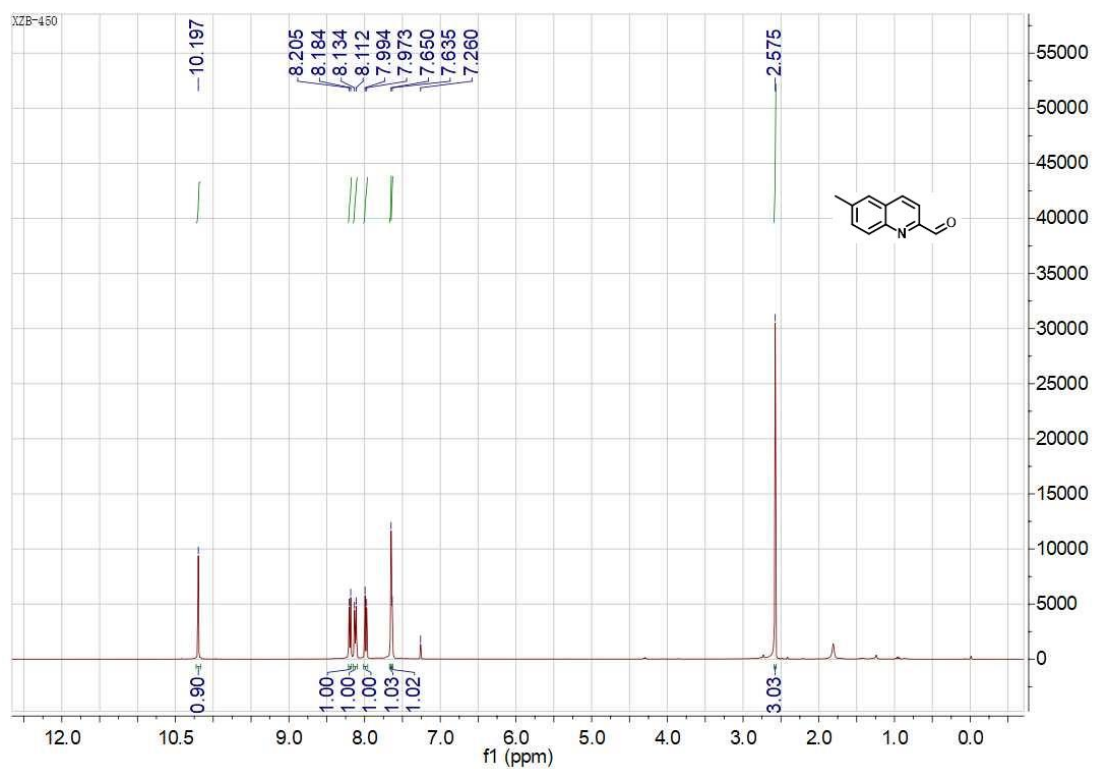

## 4-<sup>13</sup>C NMR

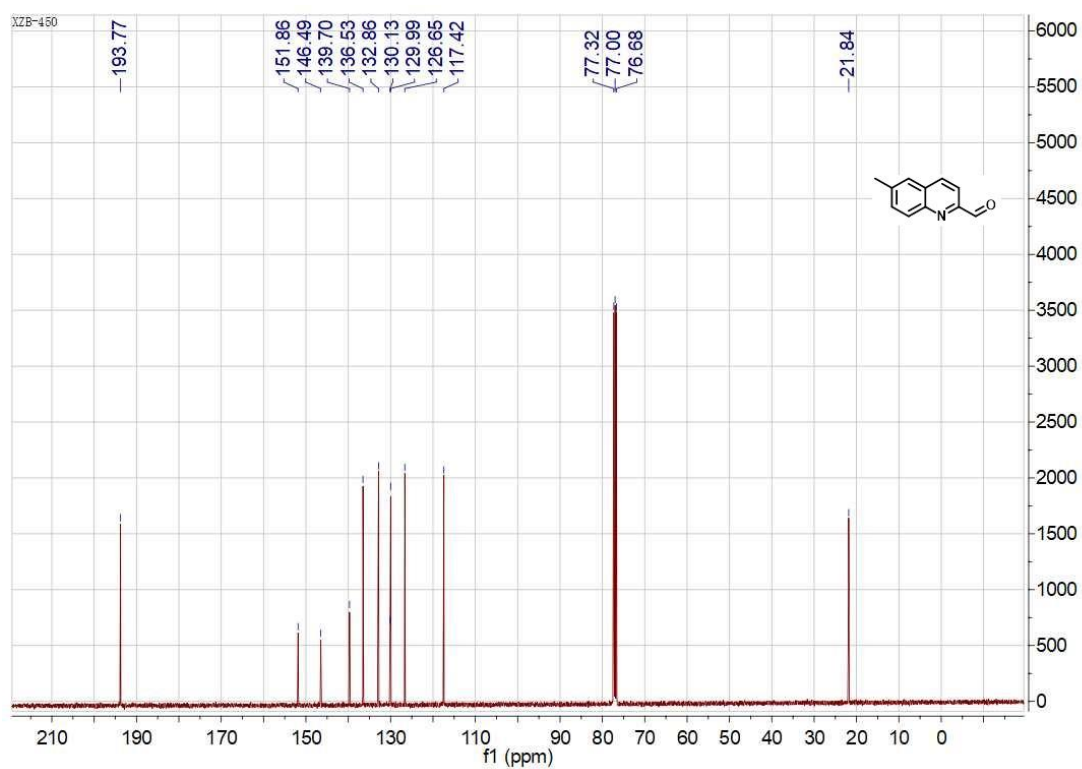

## 5-<sup>1</sup>H NMR

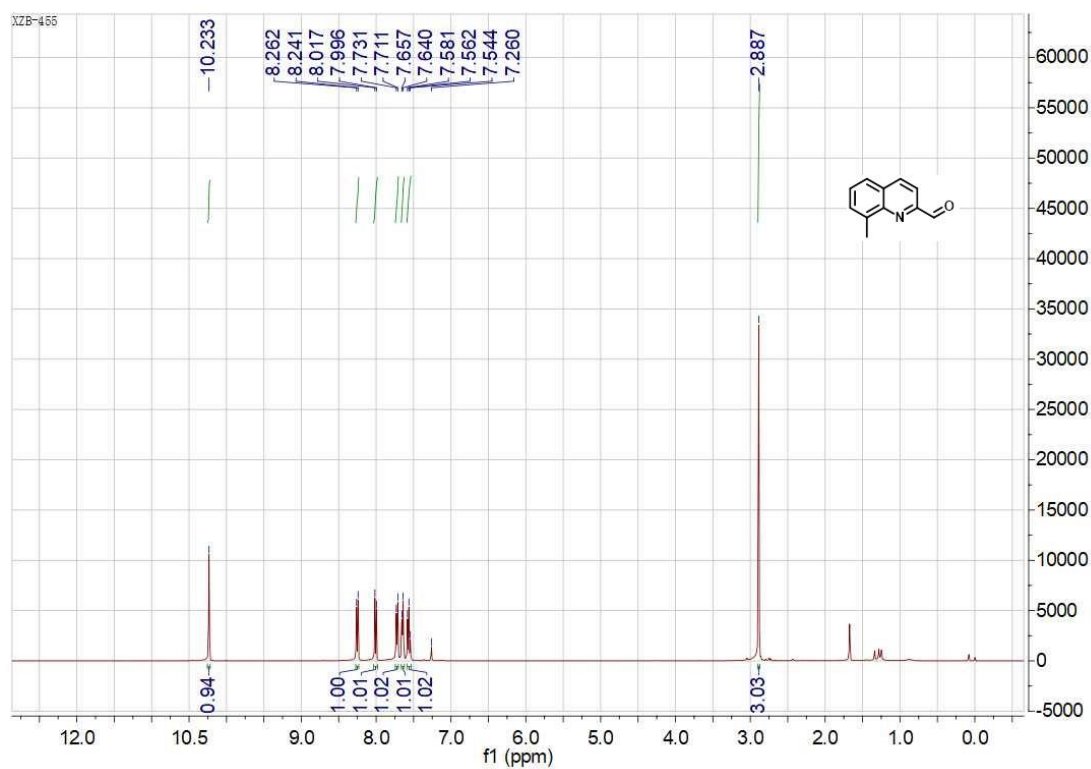

## 5-<sup>13</sup>C NMR

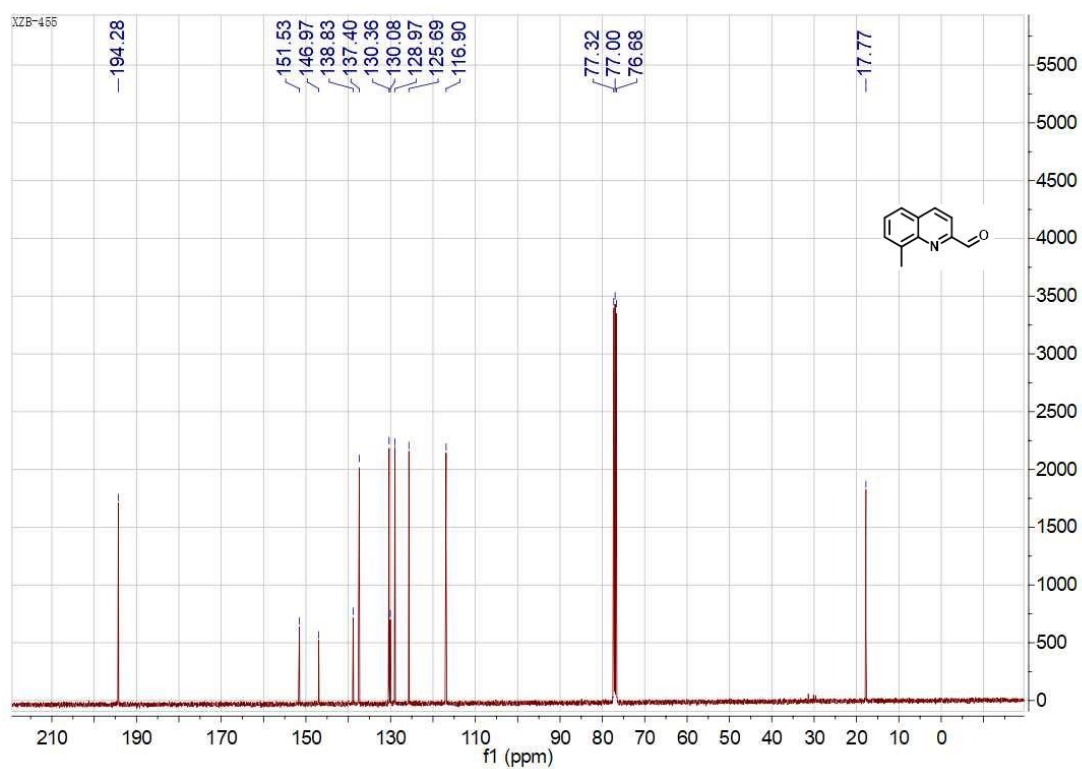

## 6-<sup>1</sup>H NMR

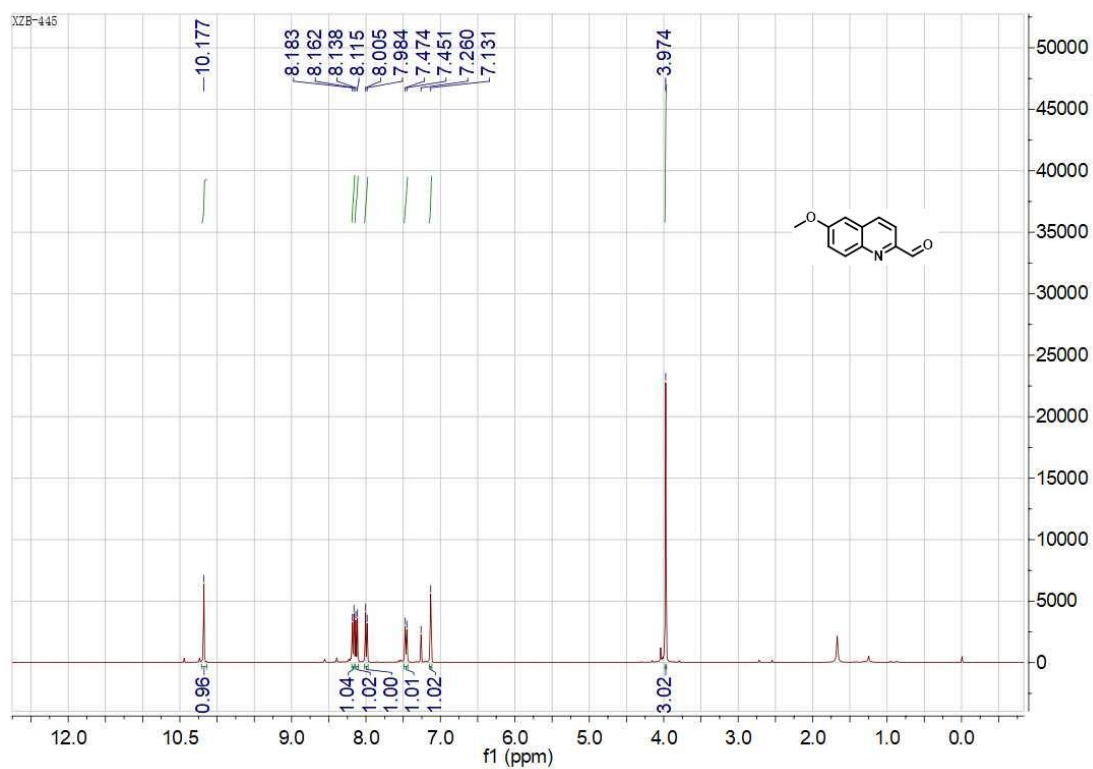

## 6-<sup>13</sup>C NMR

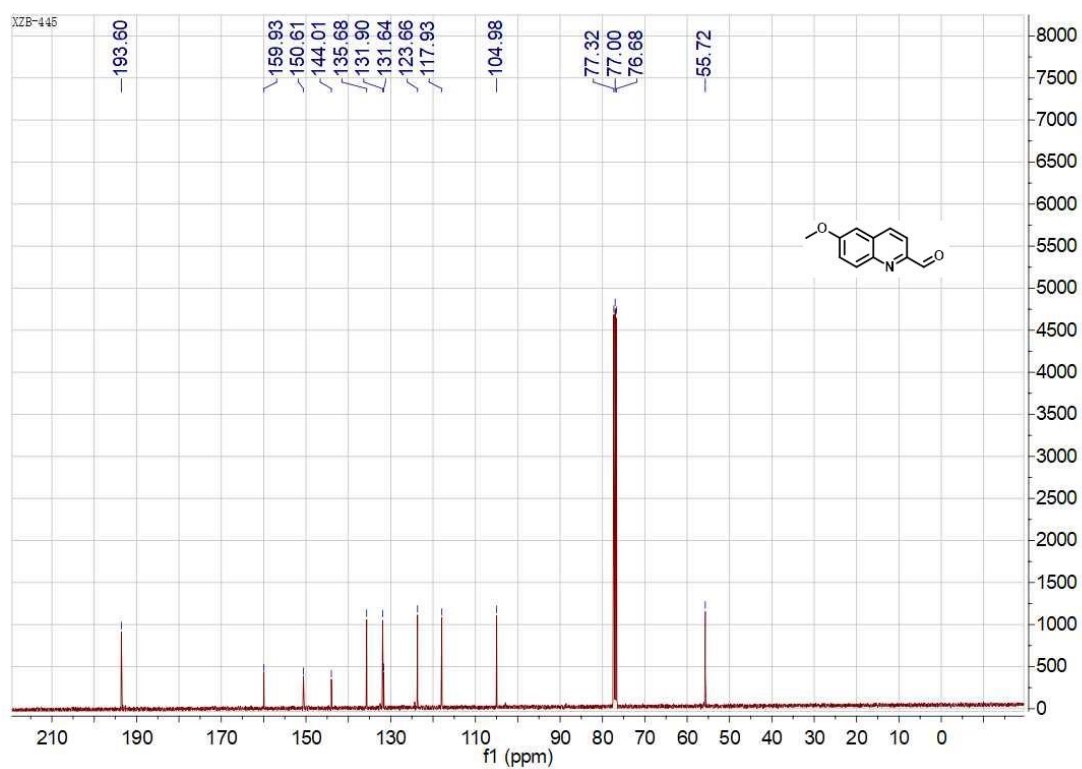

## 7-<sup>1</sup>H NMR

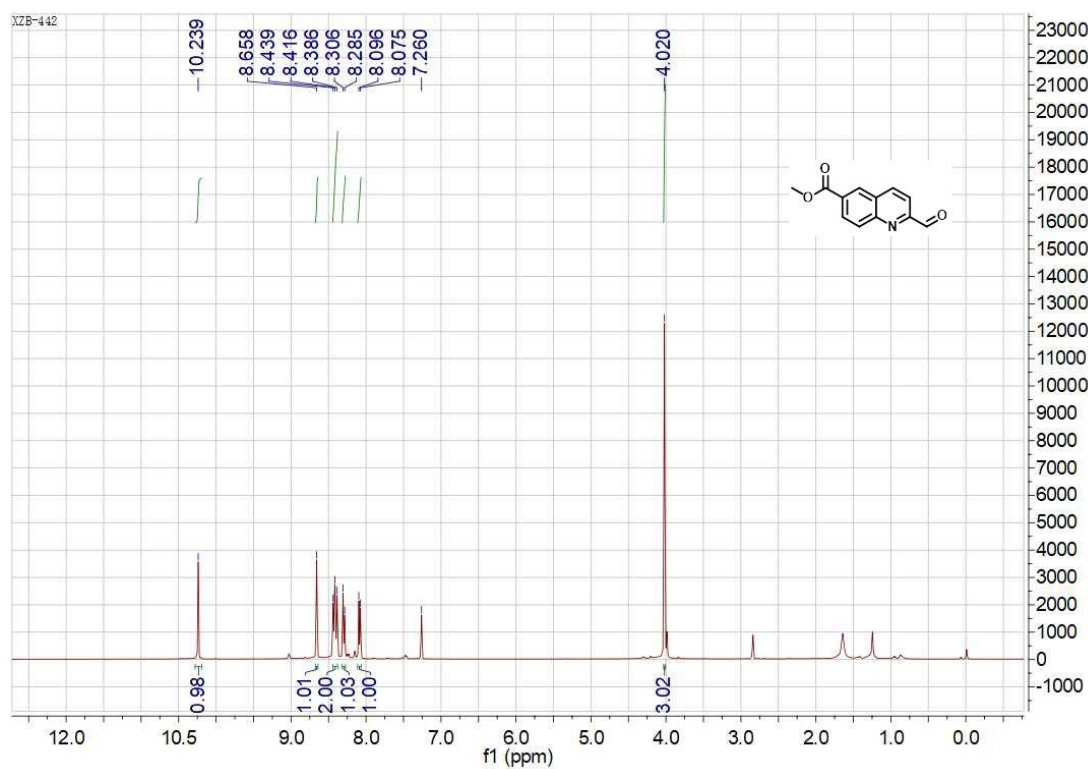

## 7-<sup>13</sup>C NMR

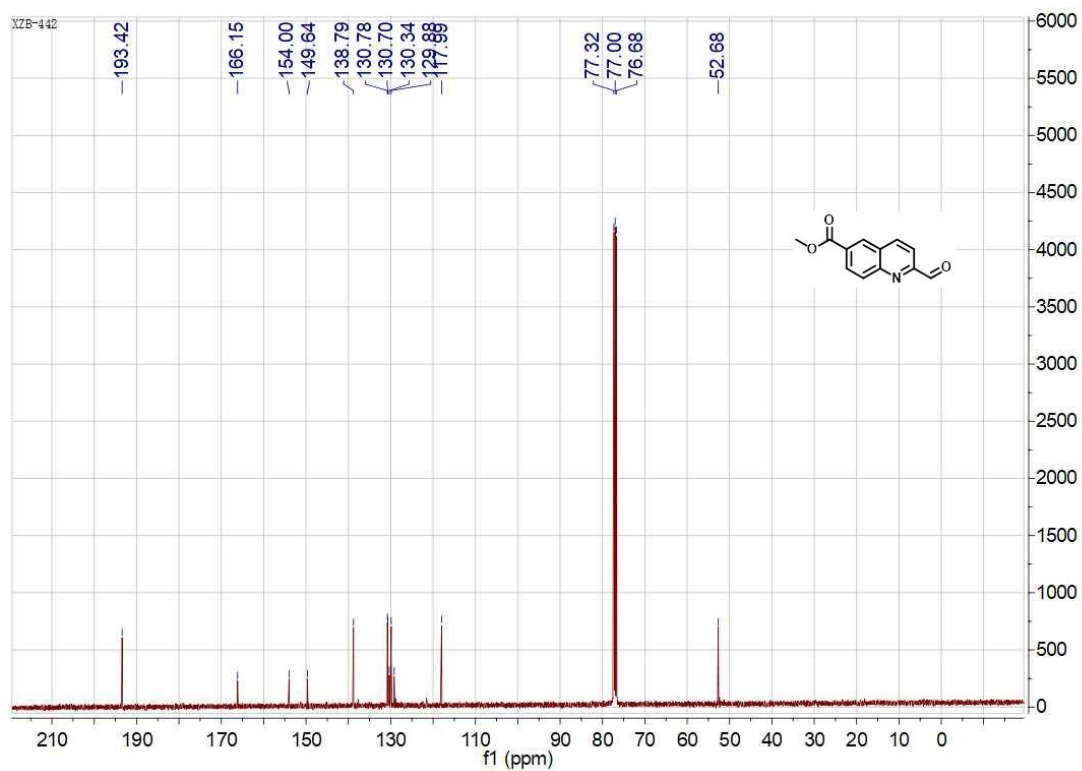

## 8-<sup>1</sup>H NMR

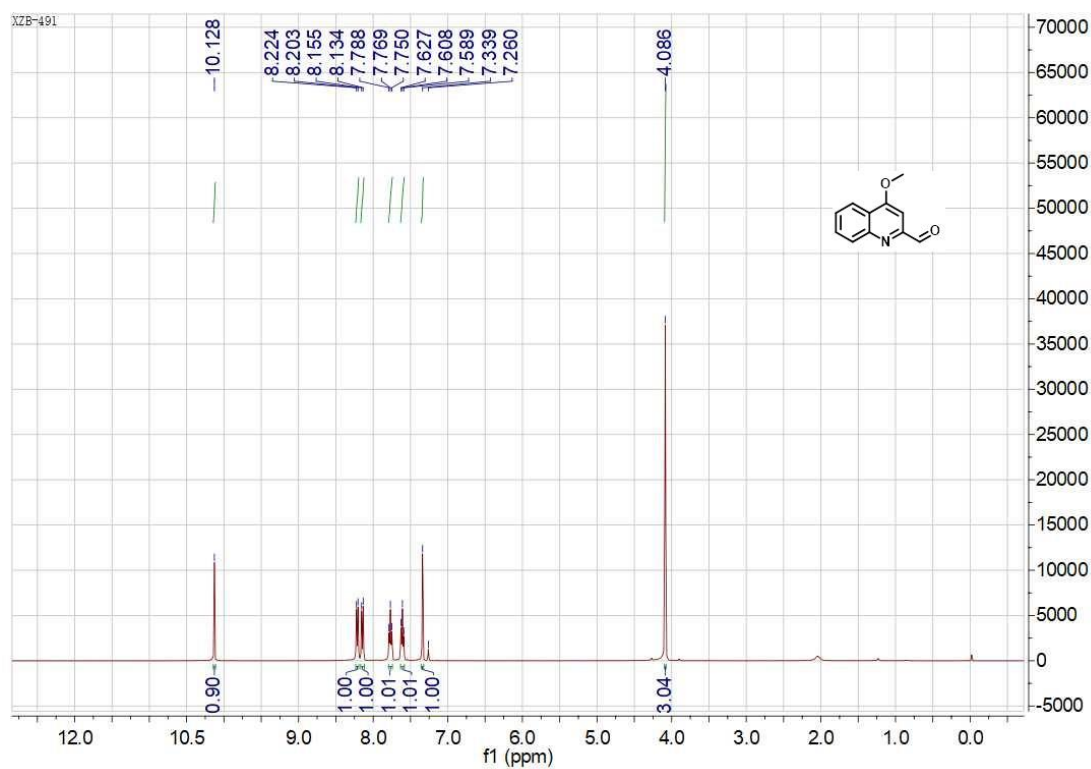

## 8-<sup>13</sup>C NMR

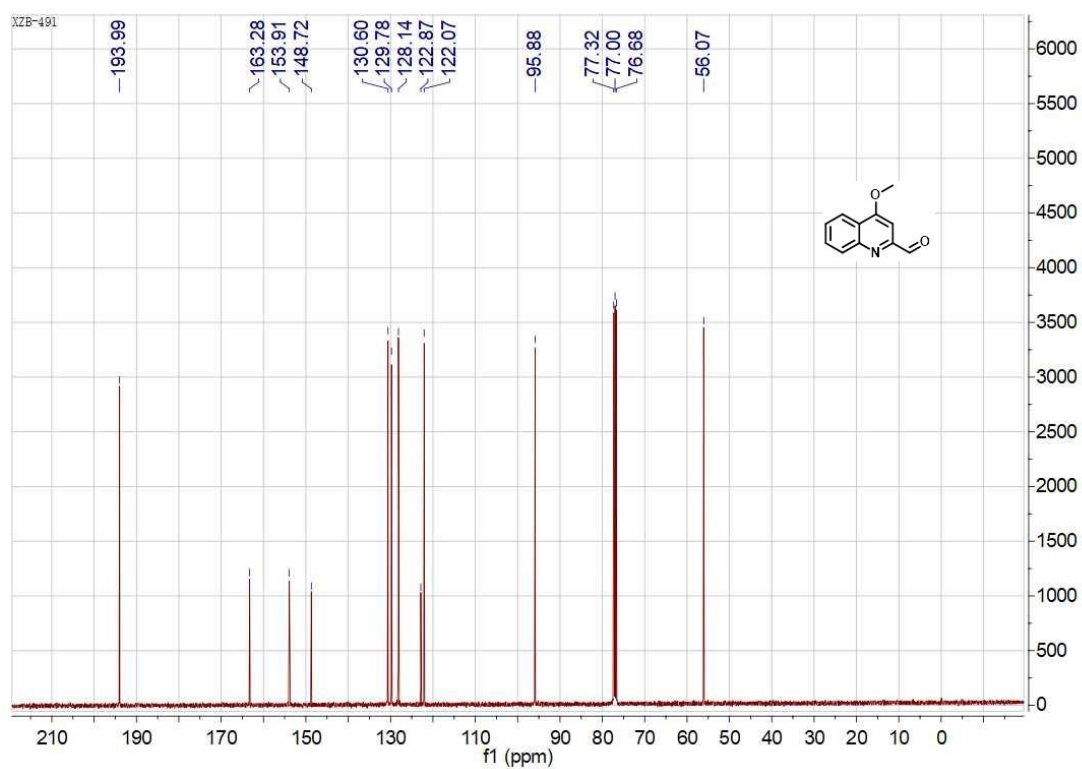

## 9-<sup>1</sup>H NMR

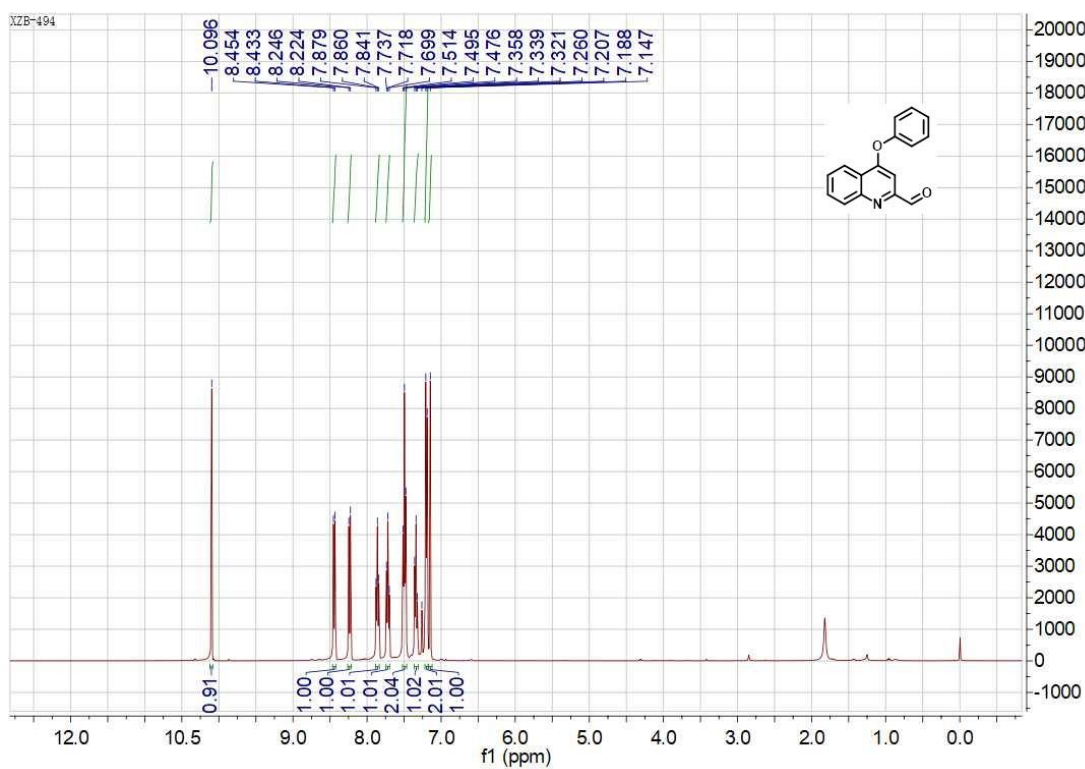

## 9-<sup>13</sup>C NMR

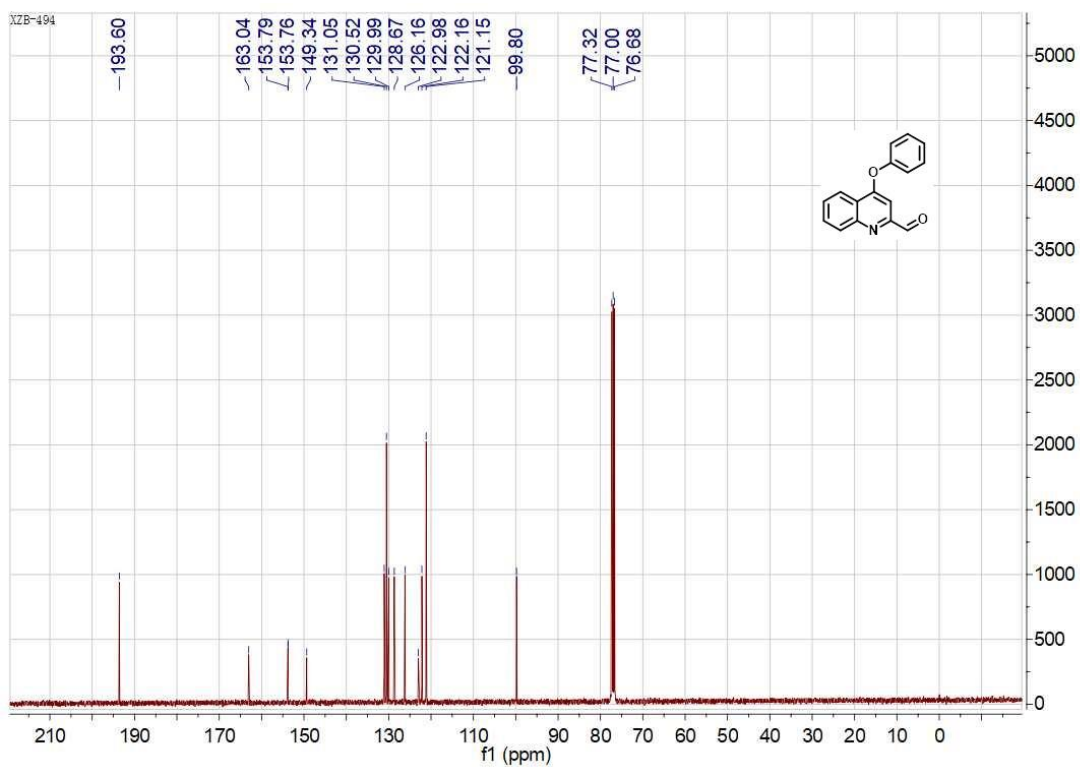

## 10-<sup>1</sup>H NMR

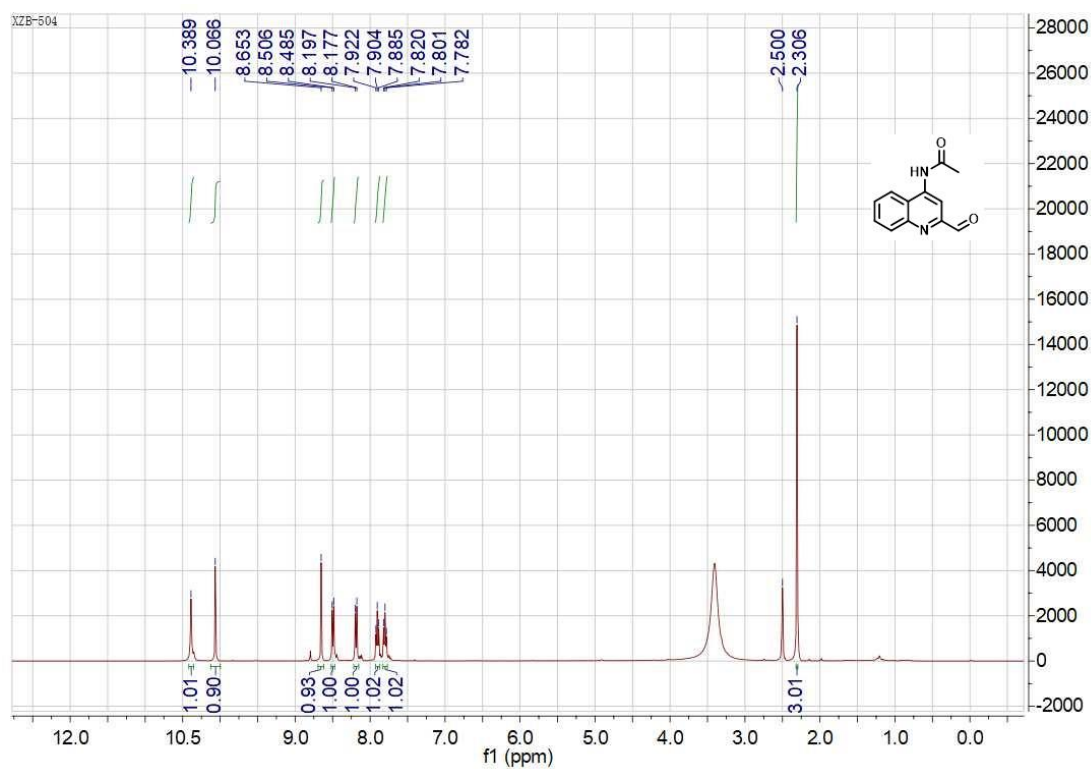

## 10-<sup>13</sup>C NMR

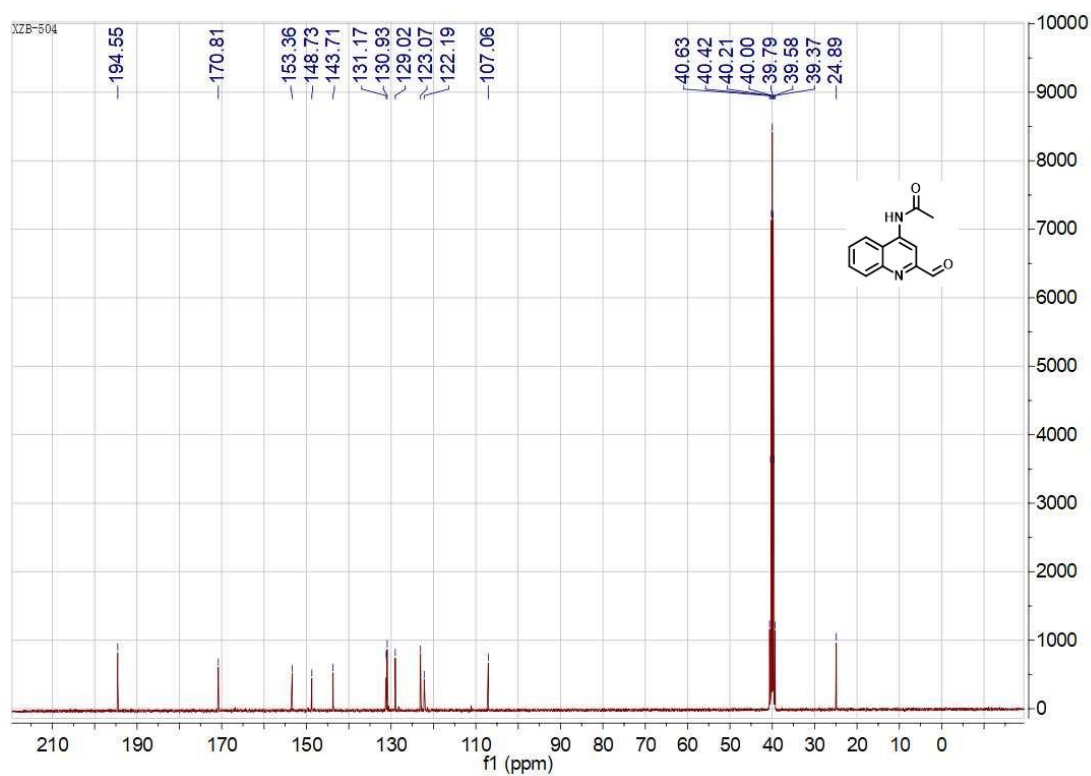

# 11-<sup>1</sup>H NMR

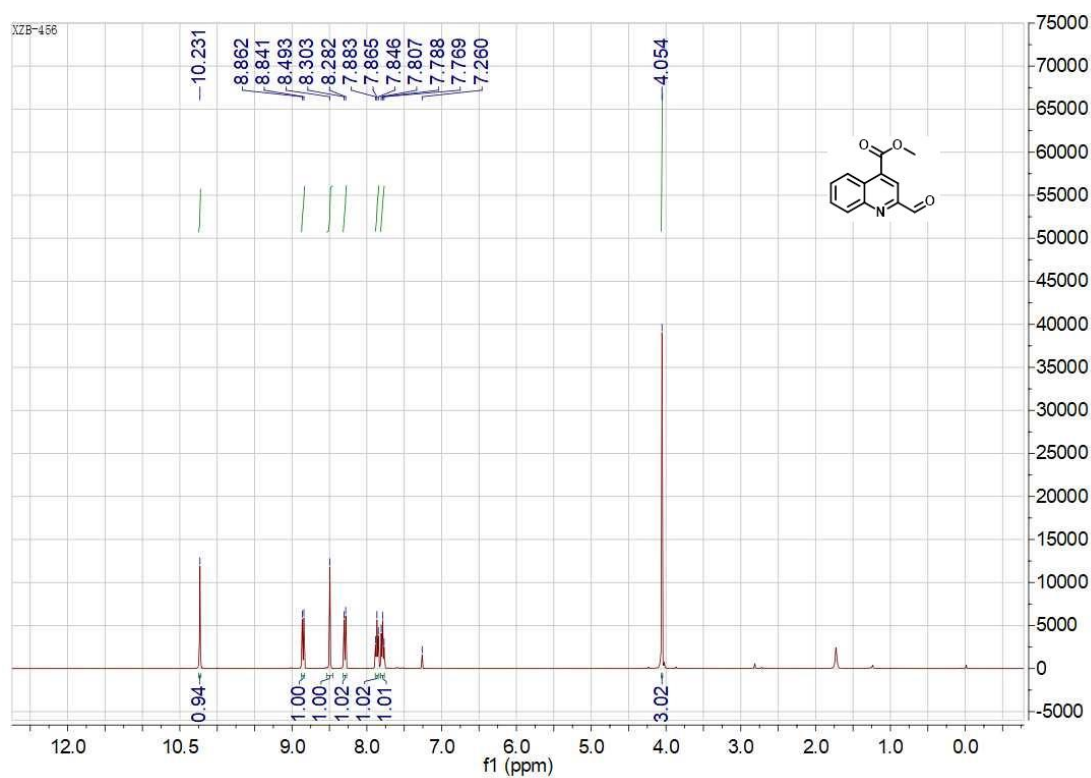

# 11-<sup>13</sup>C NMR

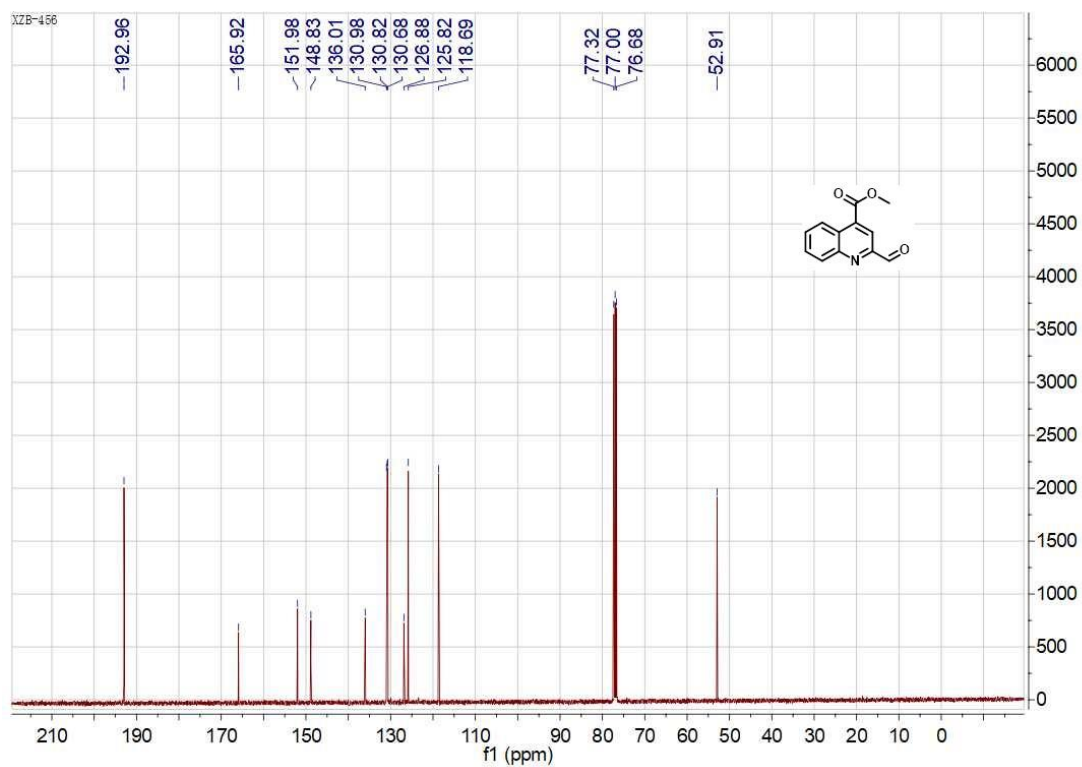



## 12-<sup>1</sup>H NMR

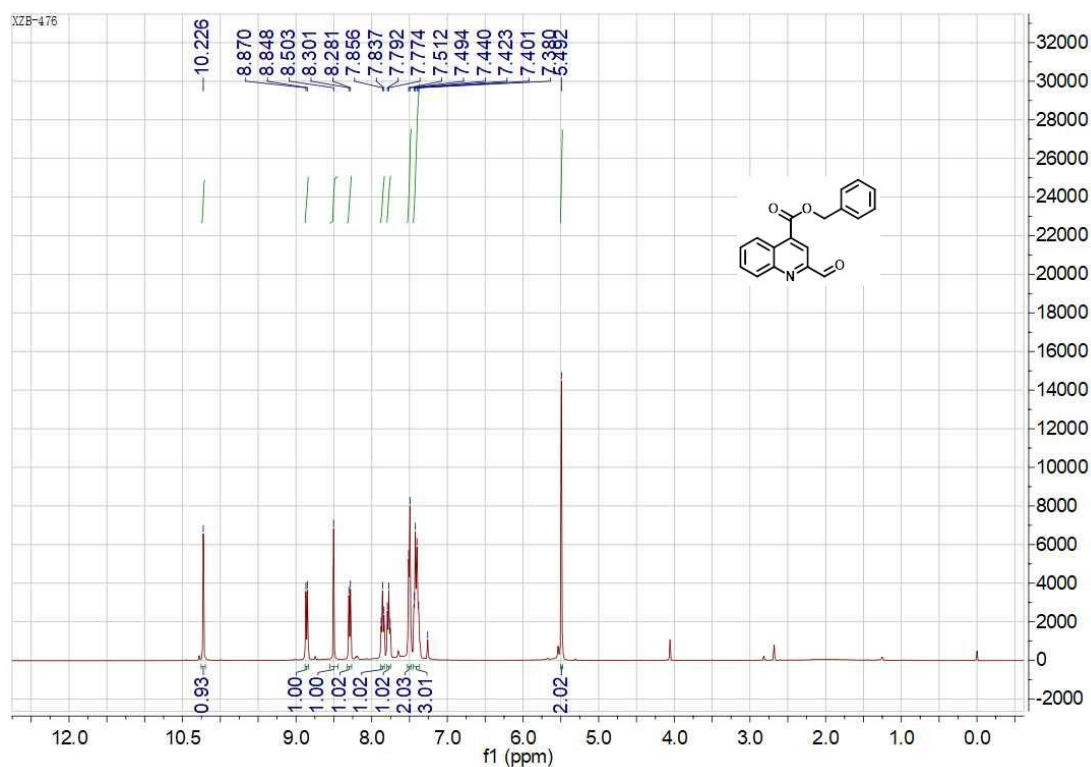

## 12-<sup>13</sup>C NMR

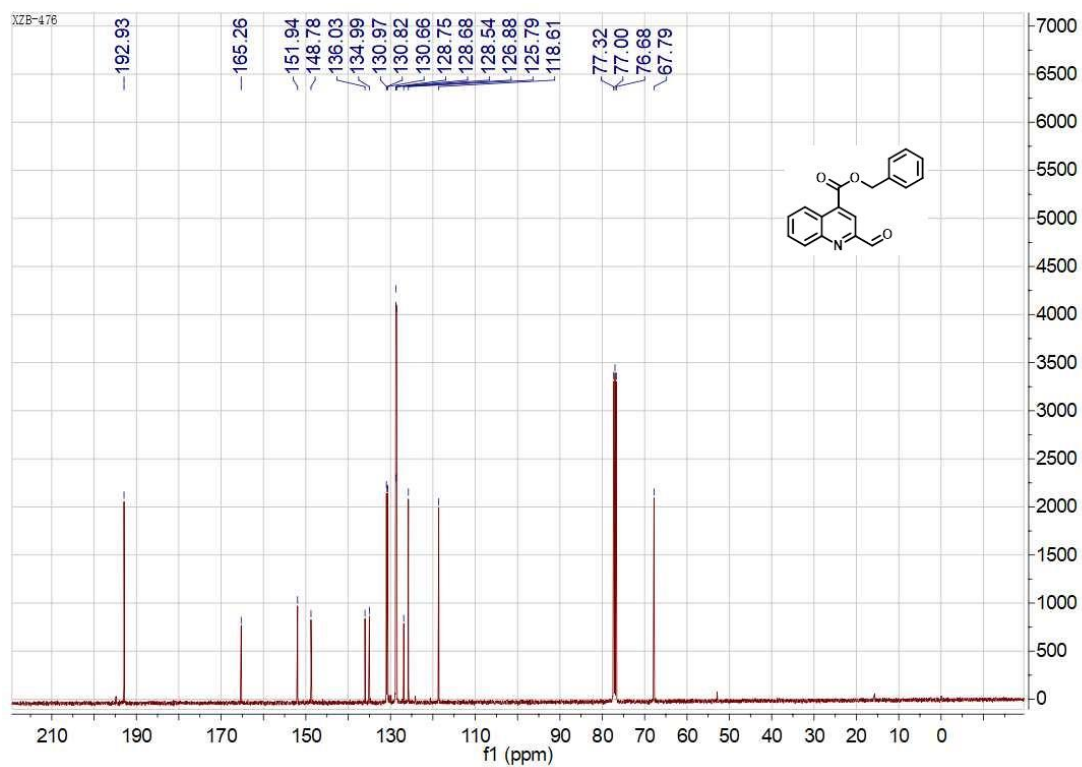

### 13-<sup>1</sup>H NMR

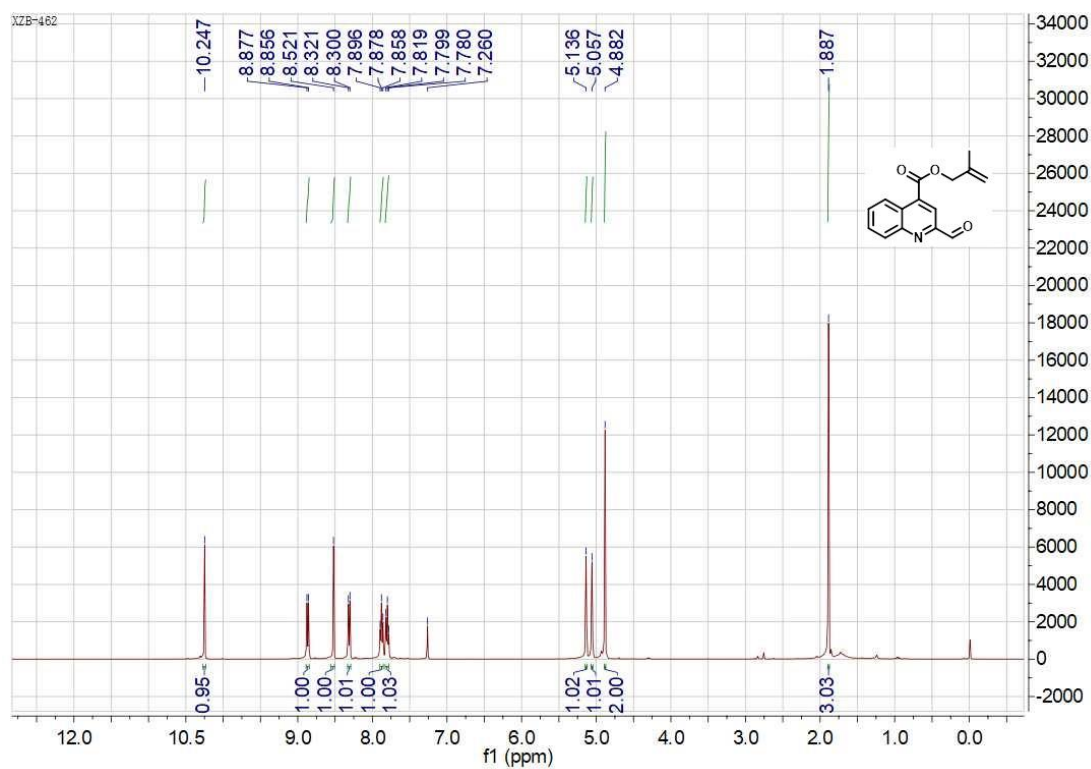

### 13-<sup>13</sup>C NMR

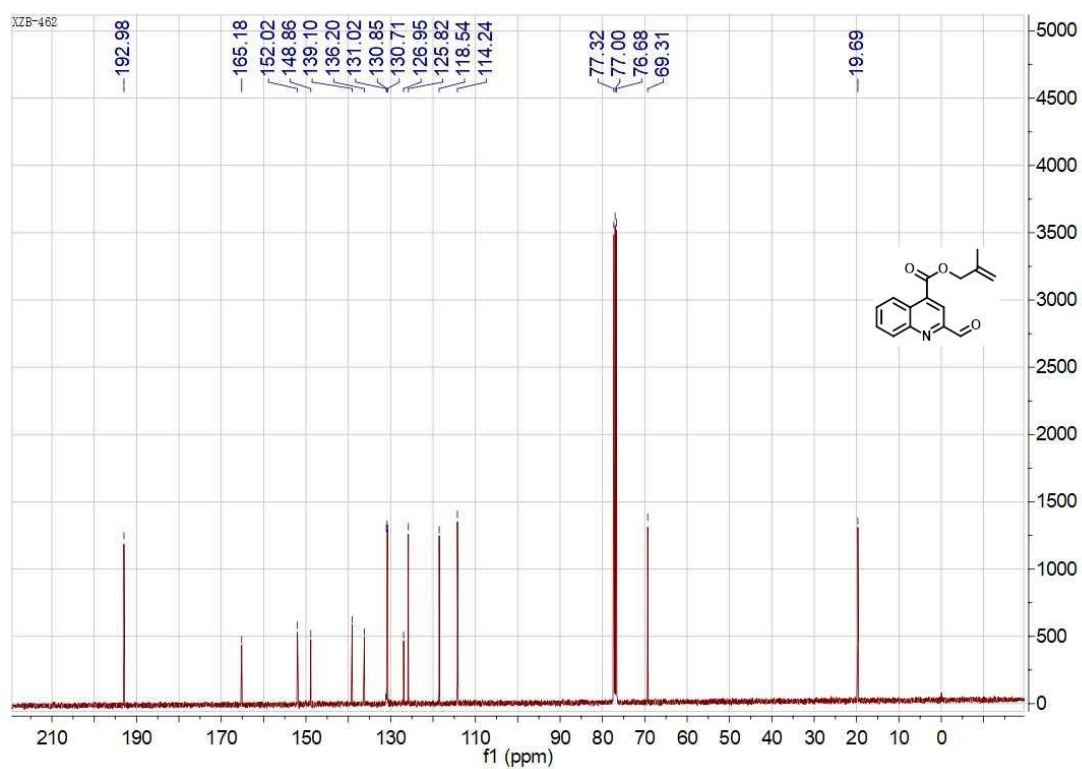

## 14-<sup>1</sup>H NMR

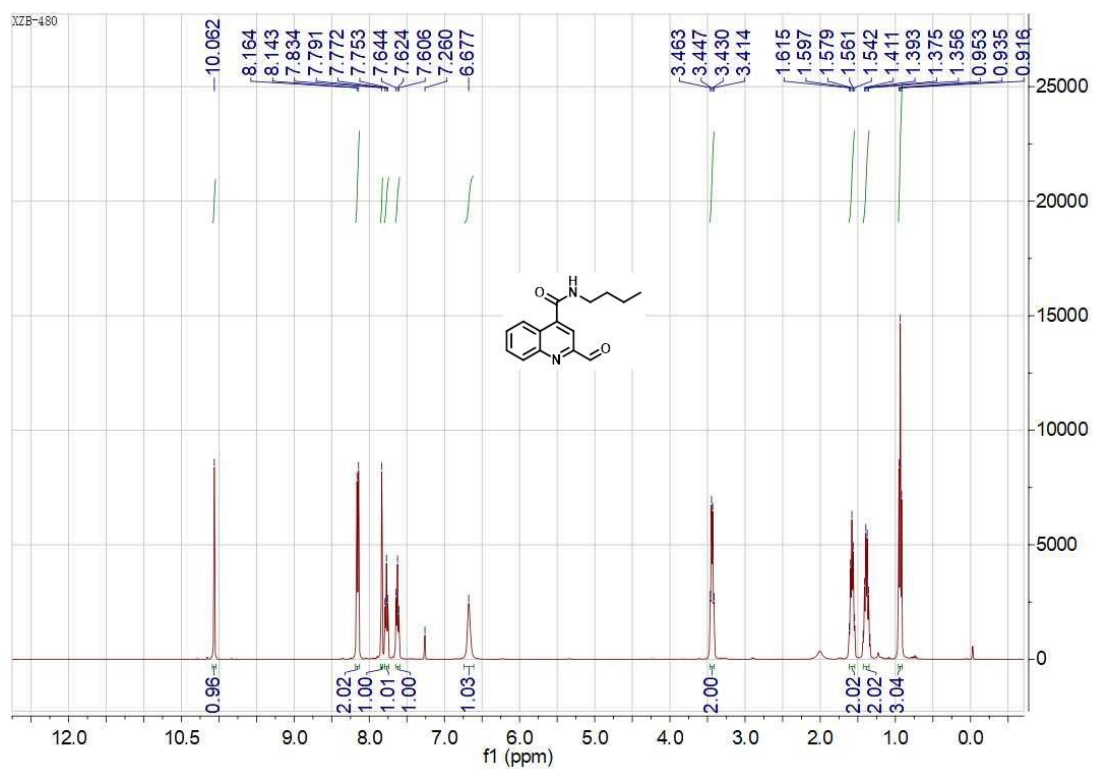

## 14-<sup>13</sup>C NMR

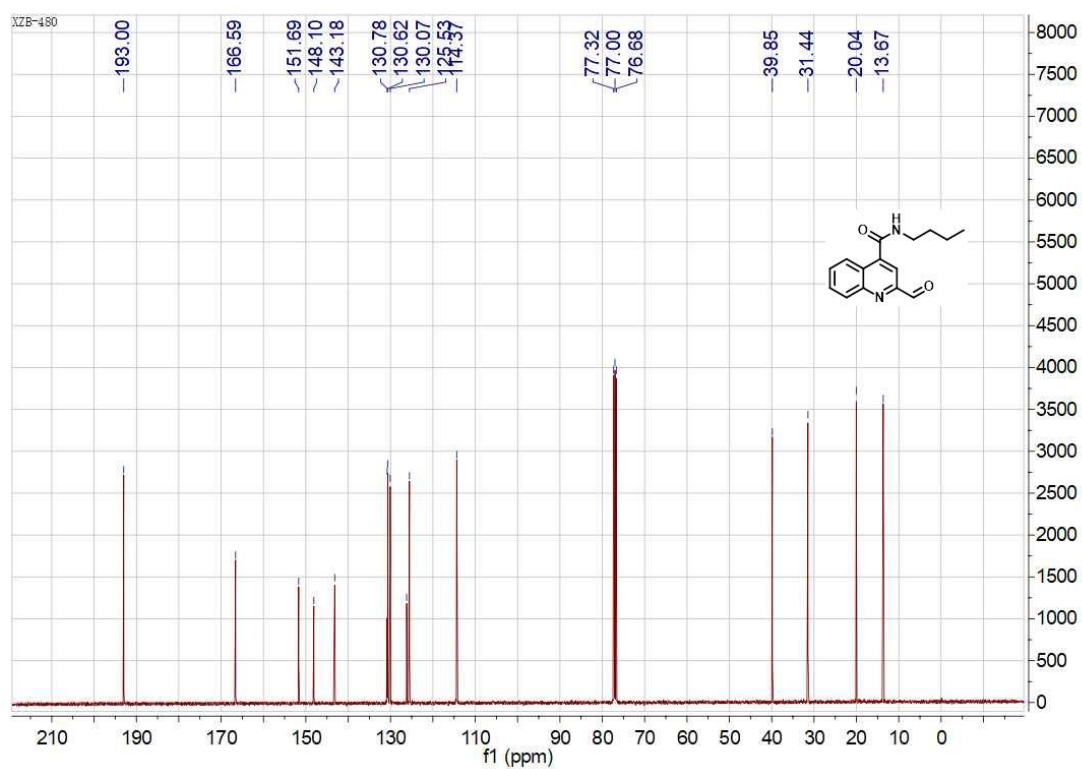

# 15-<sup>1</sup>H NMR

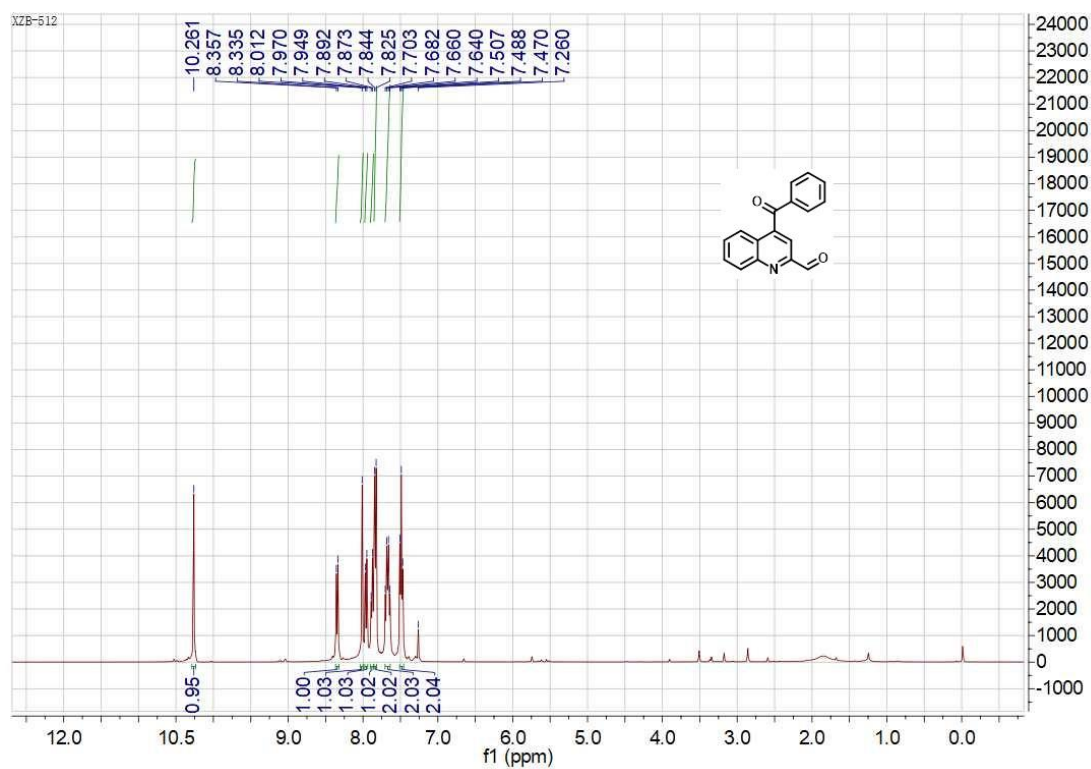

# 15-<sup>13</sup>C NMR

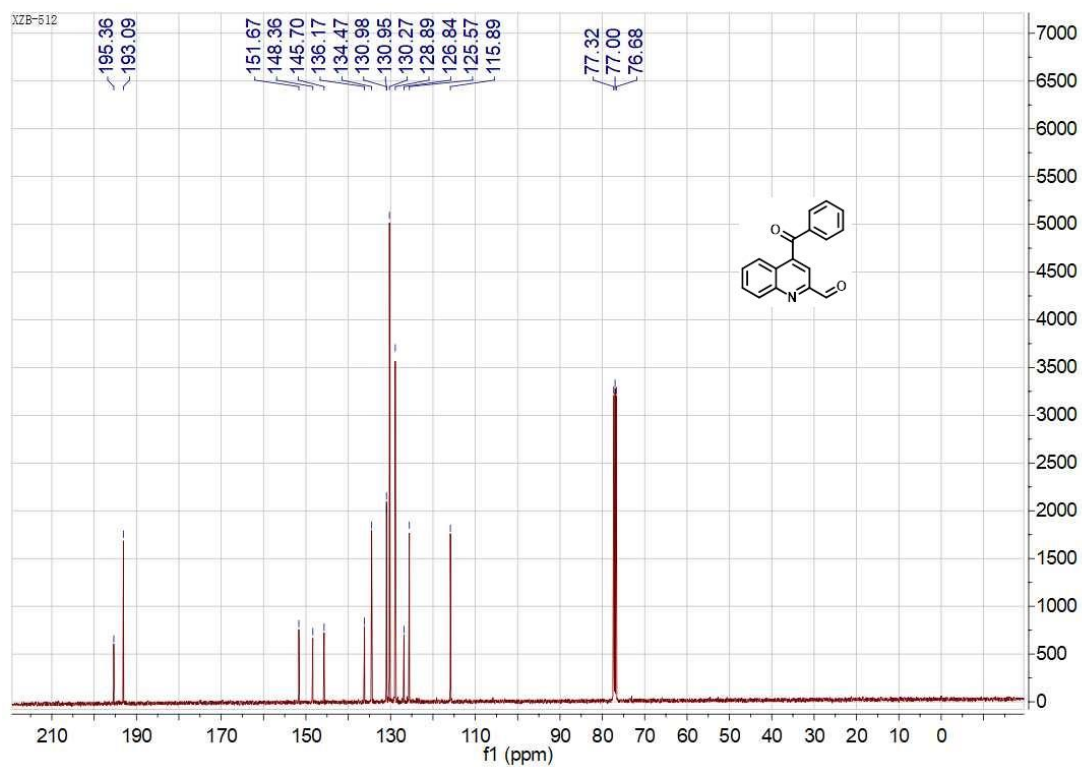

## 16-<sup>1</sup>H NMR

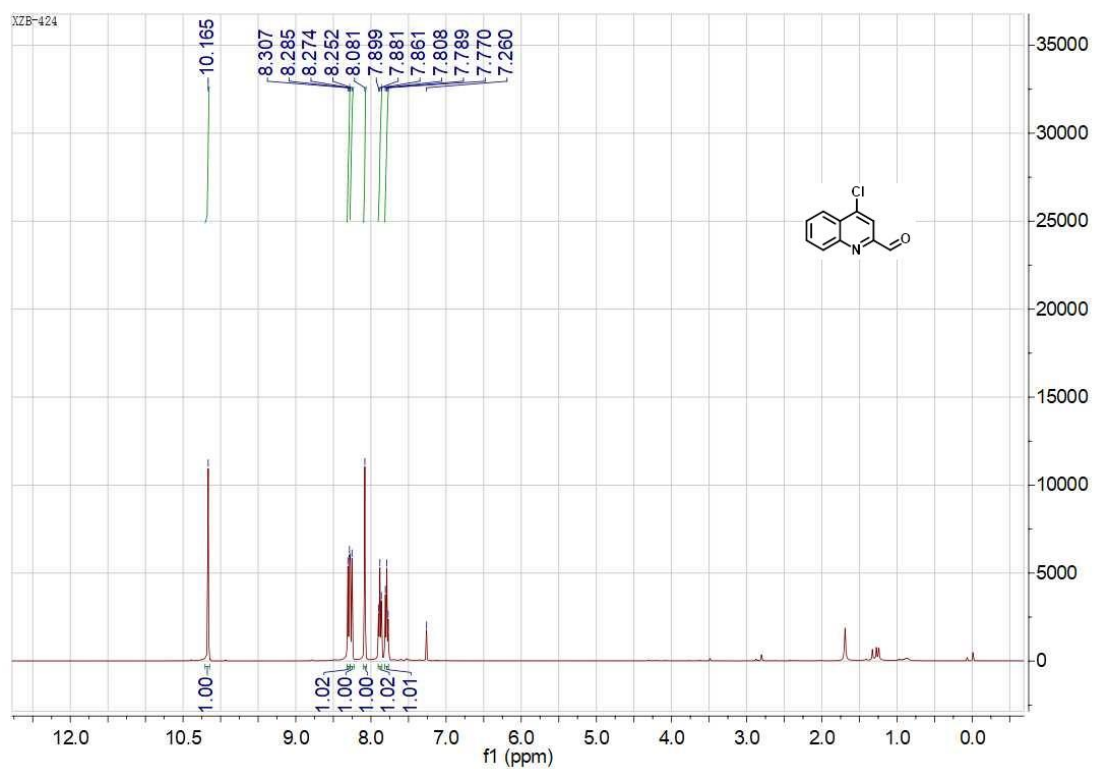

## 16-<sup>13</sup>C NMR

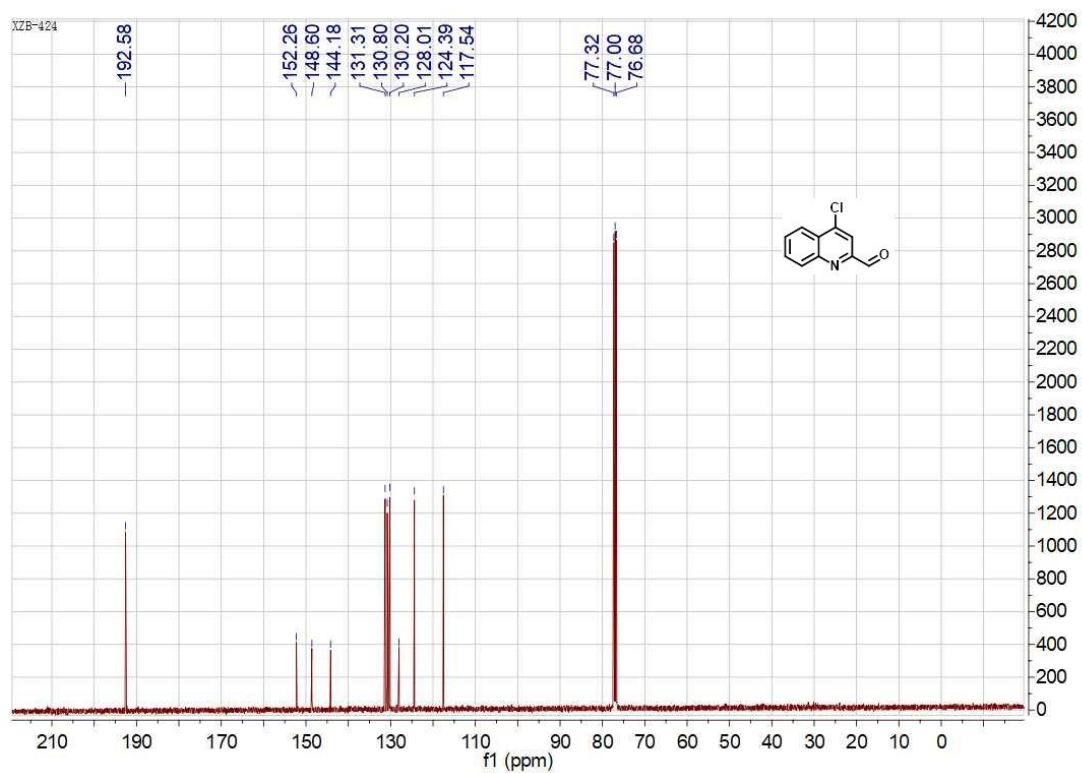

## 17-<sup>1</sup>H NMR

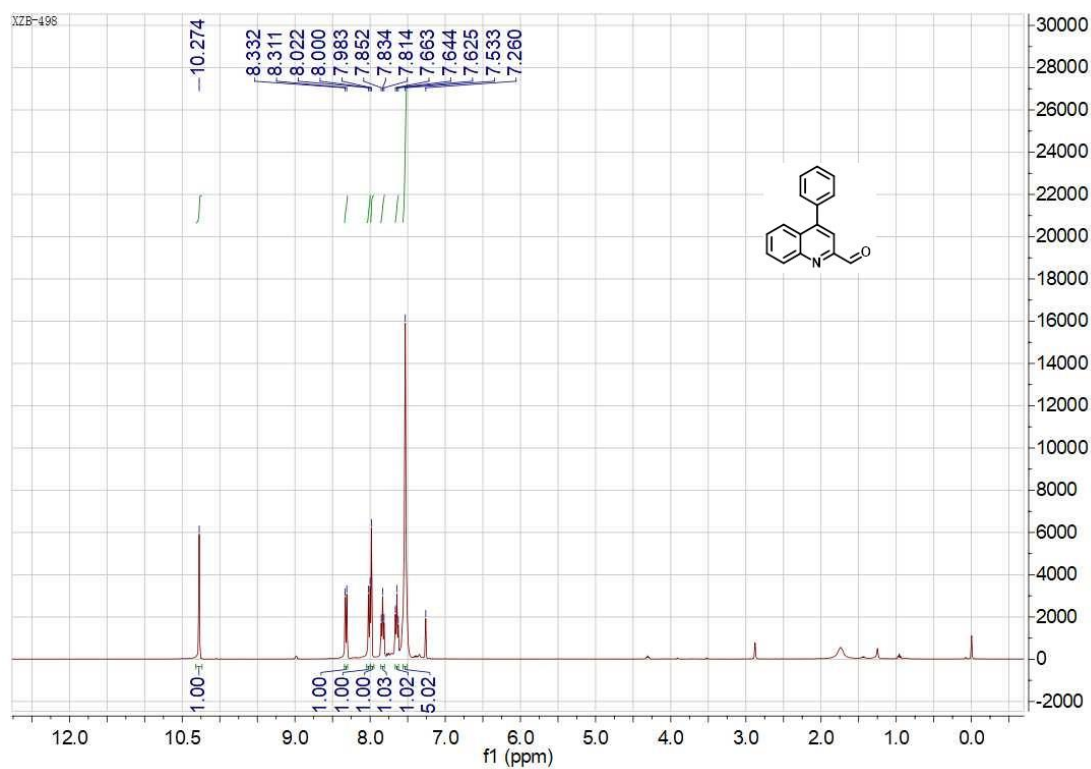

## 17-<sup>13</sup>C NMR

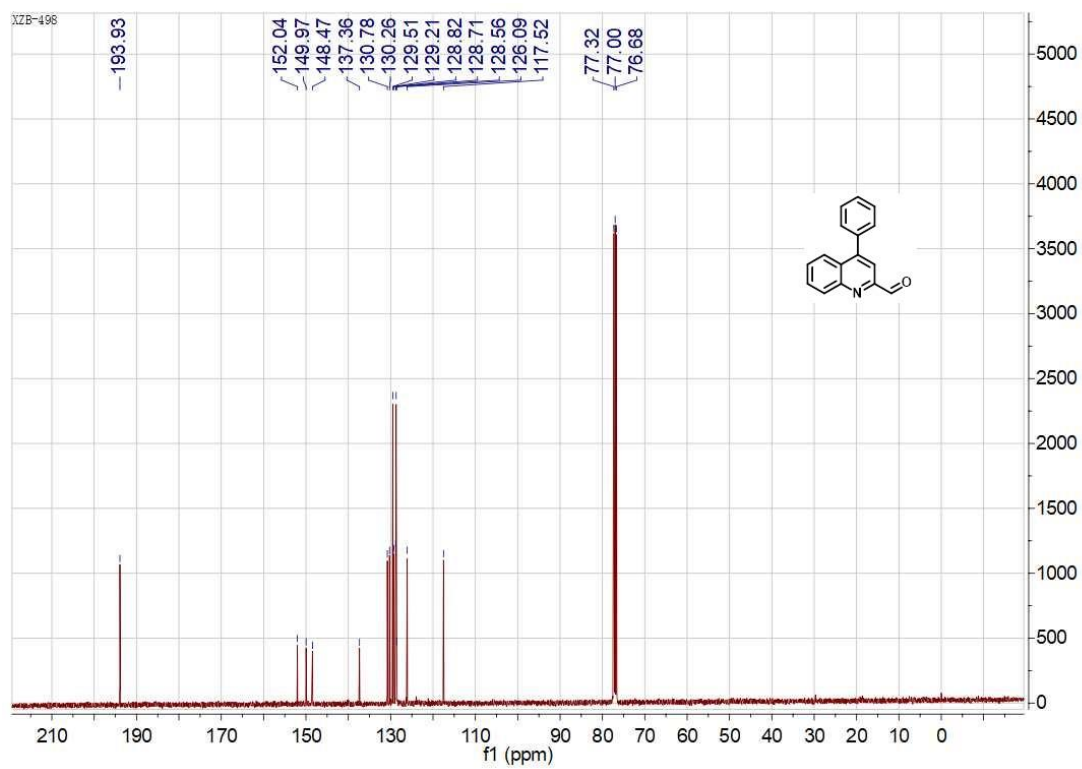

## 18-<sup>1</sup>H NMR

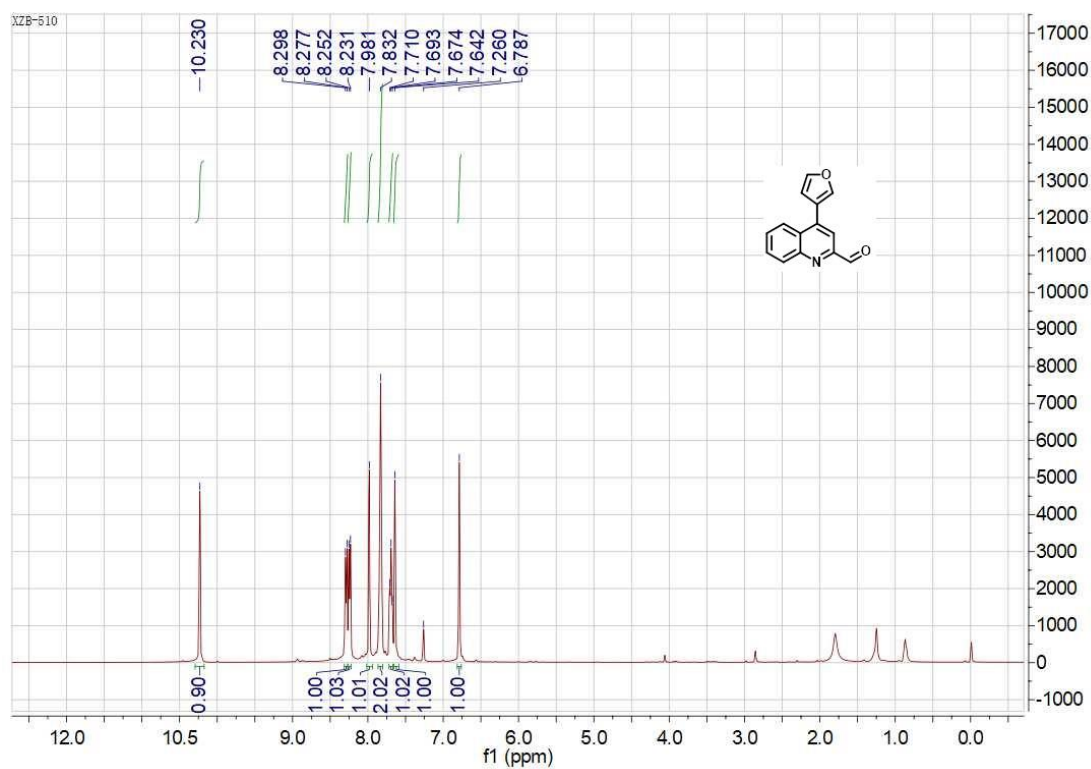

## 18-<sup>13</sup>C NMR

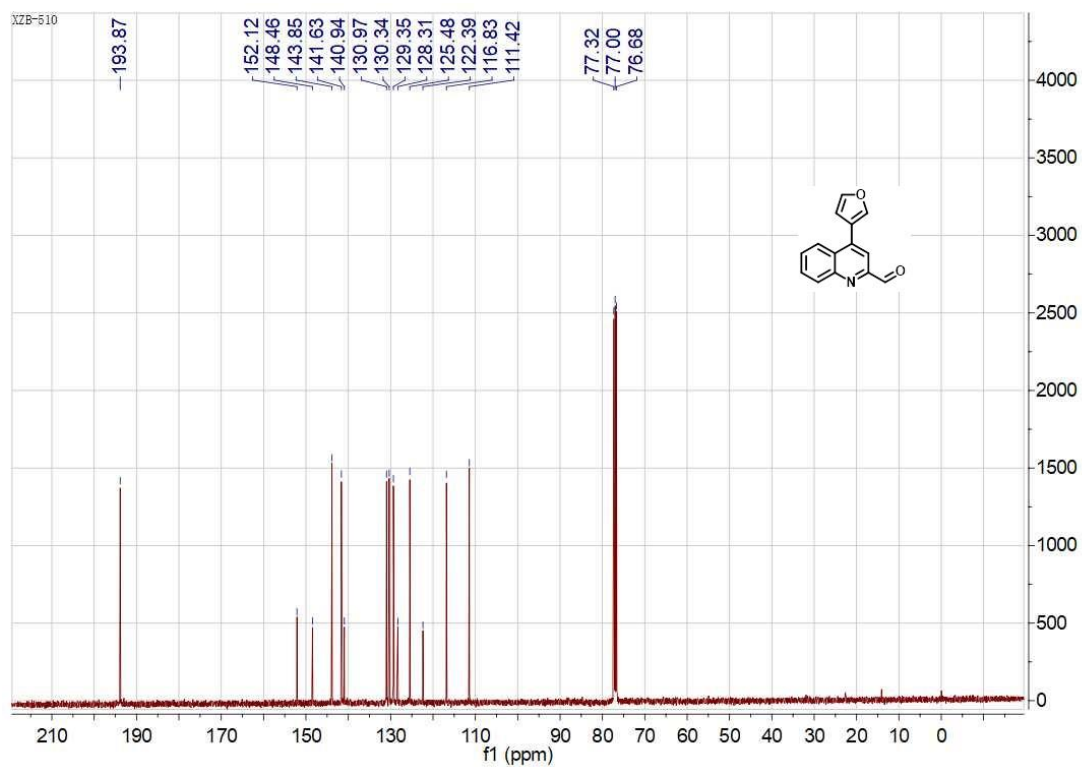

## 19-<sup>1</sup>H NMR

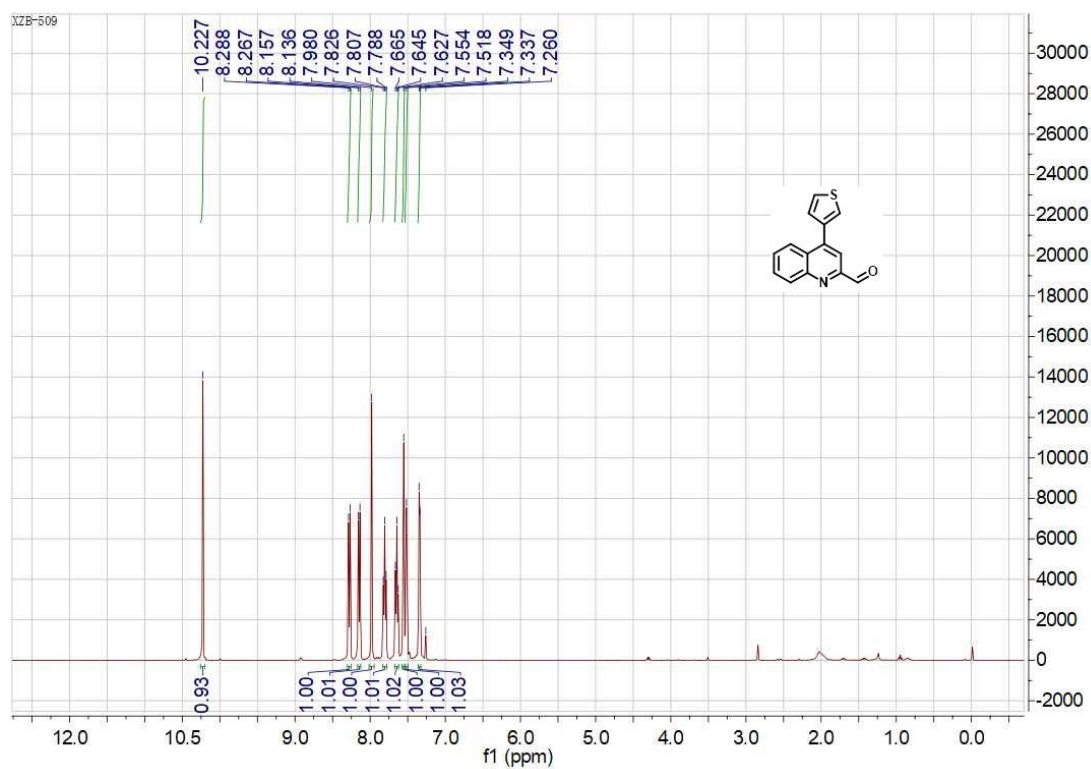

## 19-<sup>13</sup>C NMR

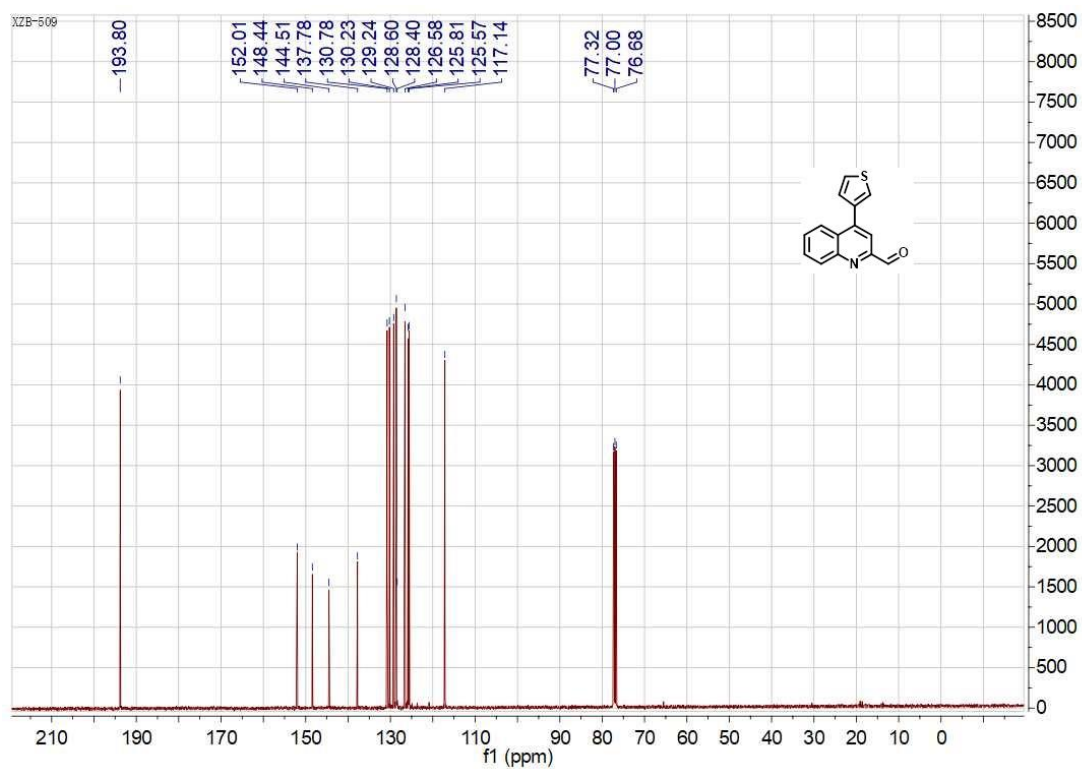



## 20-<sup>1</sup>H NMR

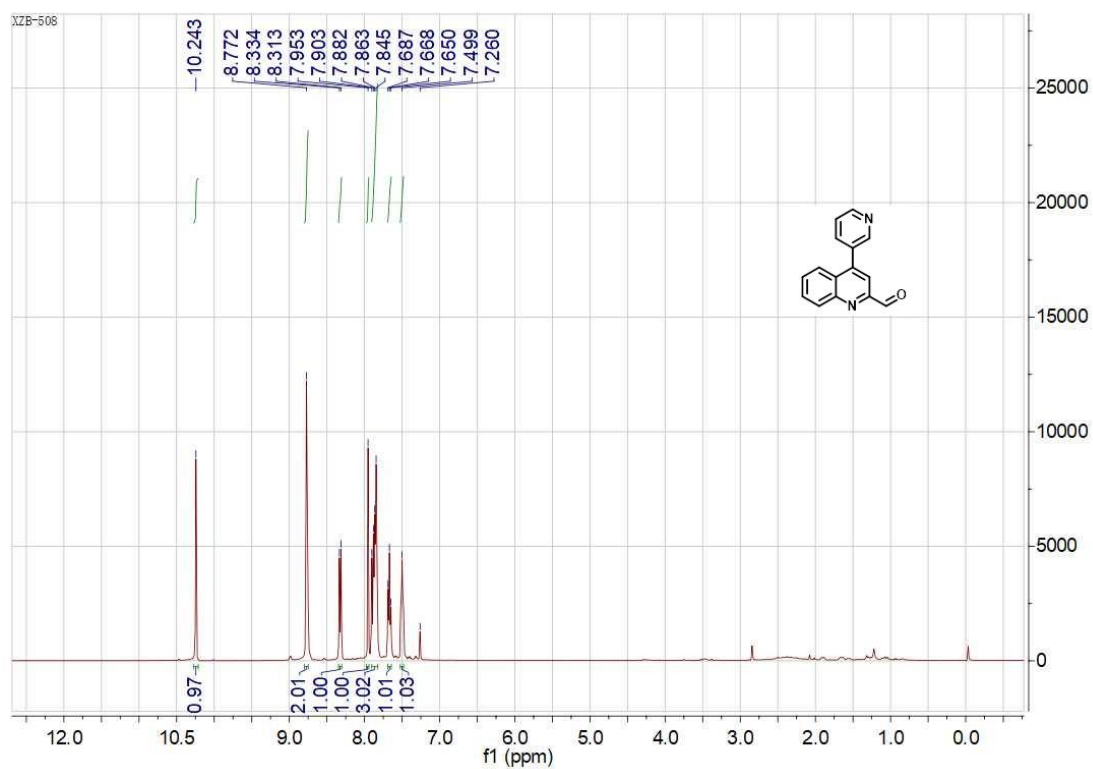

## 20-<sup>13</sup>C NMR

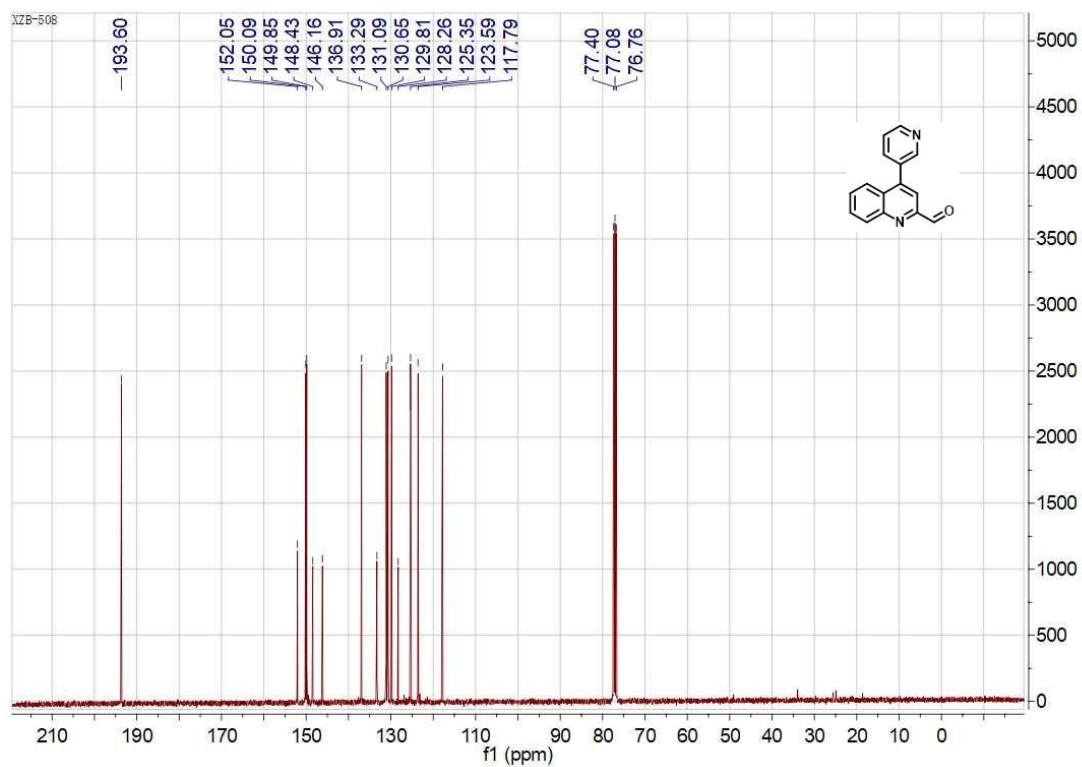

## 21-<sup>1</sup>H NMR

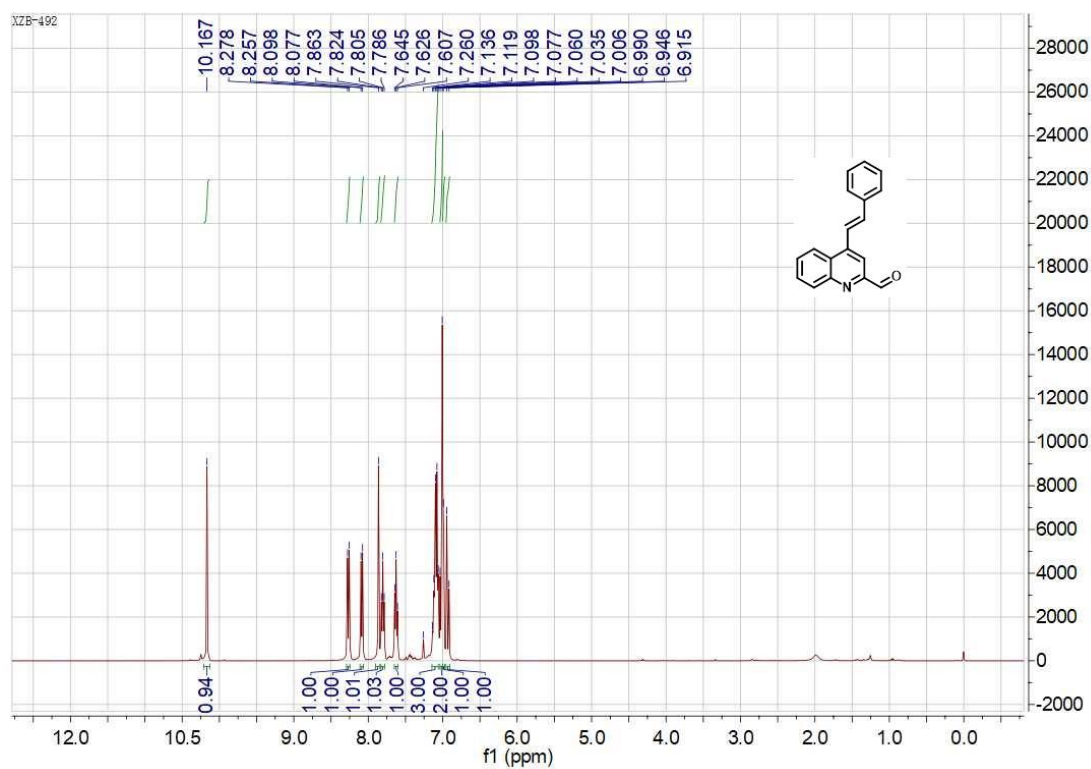

## 21-<sup>13</sup>C NMR

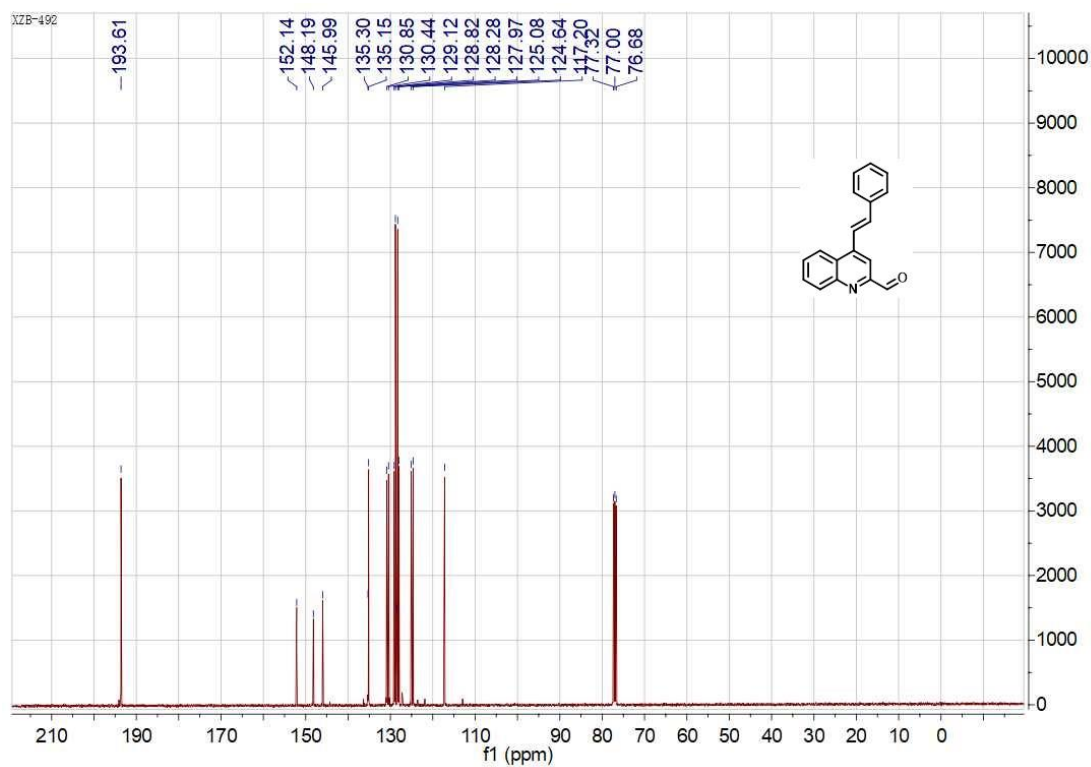

## 22-<sup>1</sup>H NMR

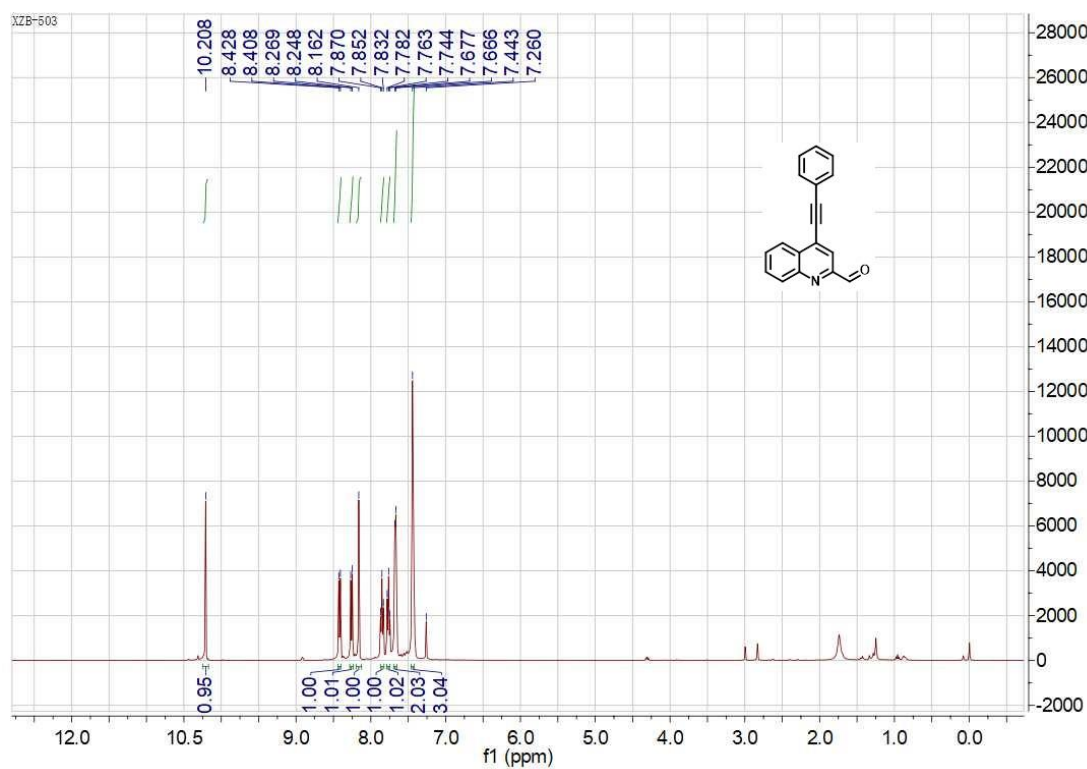

## 22-<sup>13</sup>C NMR

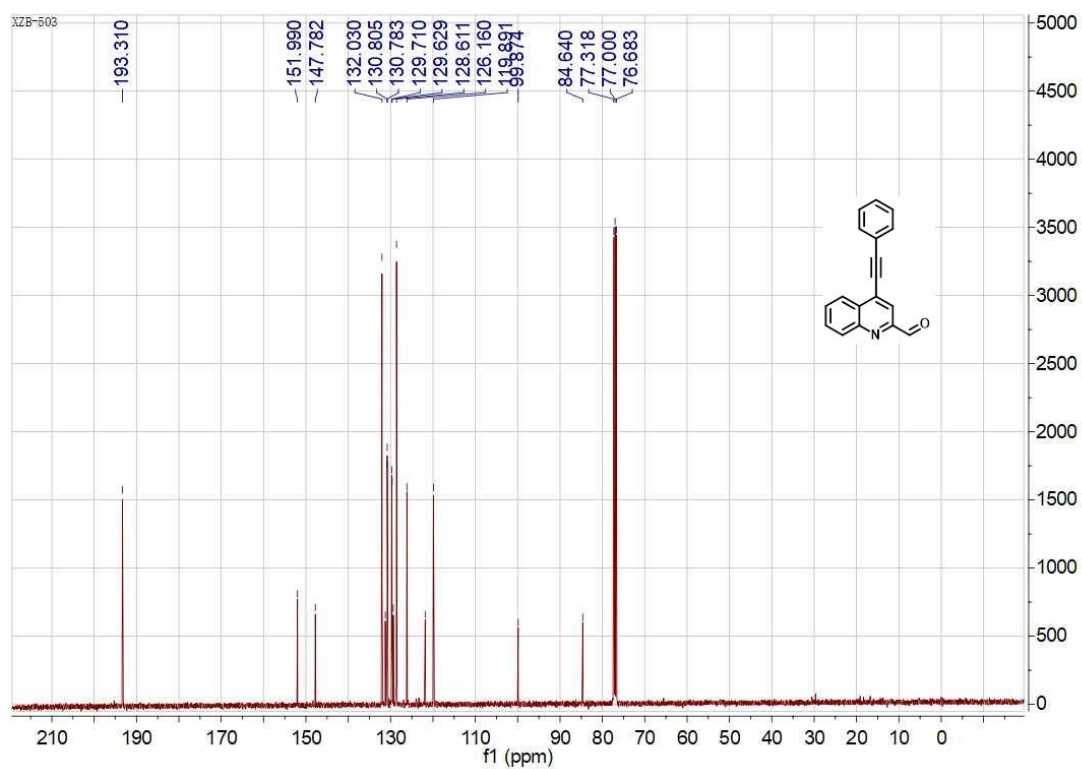

### 23-<sup>1</sup>H NMR

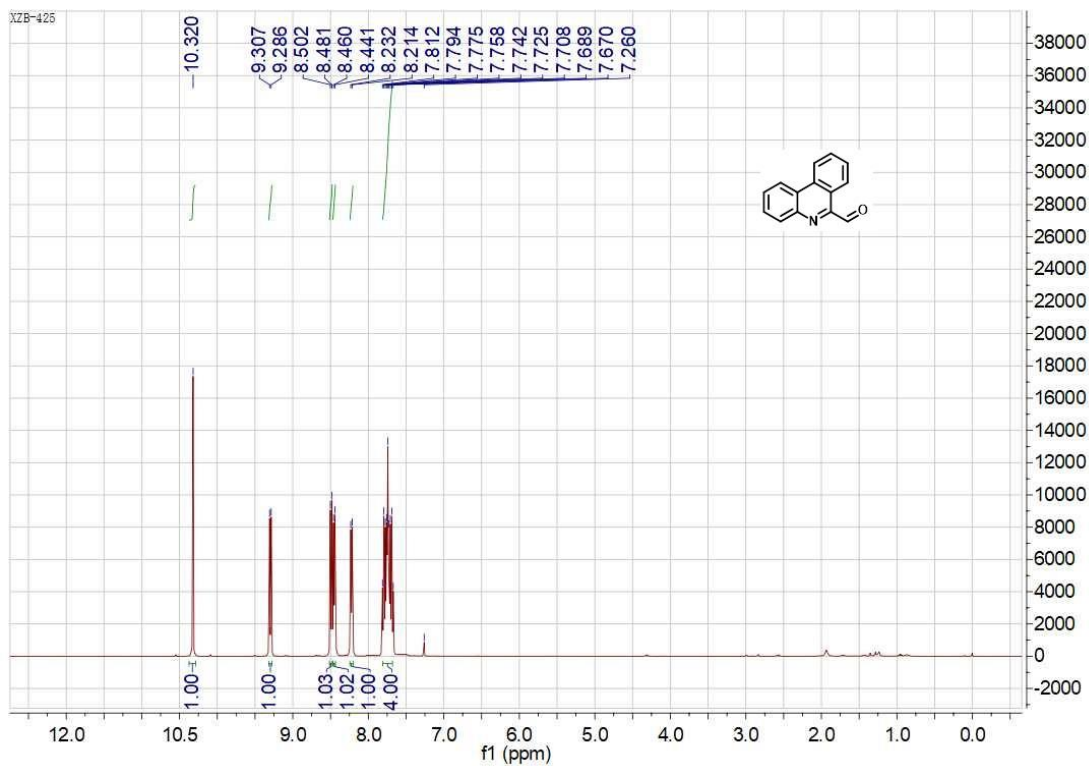

### 23-<sup>13</sup>C NMR

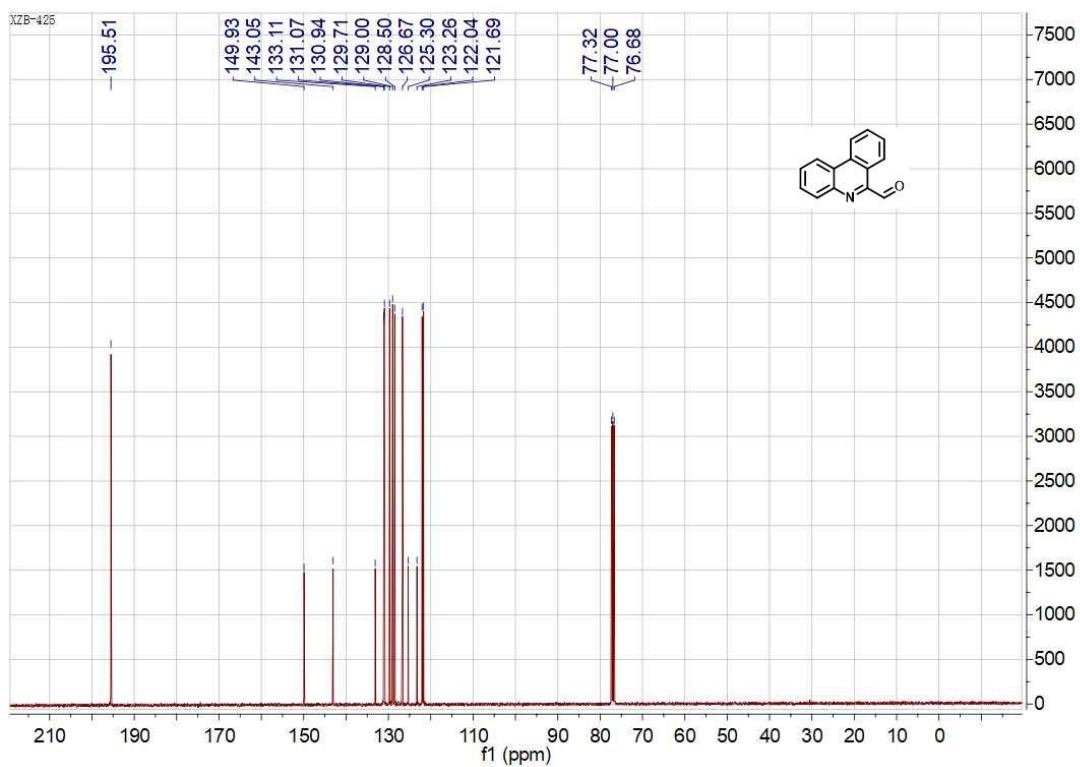

## 24-<sup>1</sup>H NMR

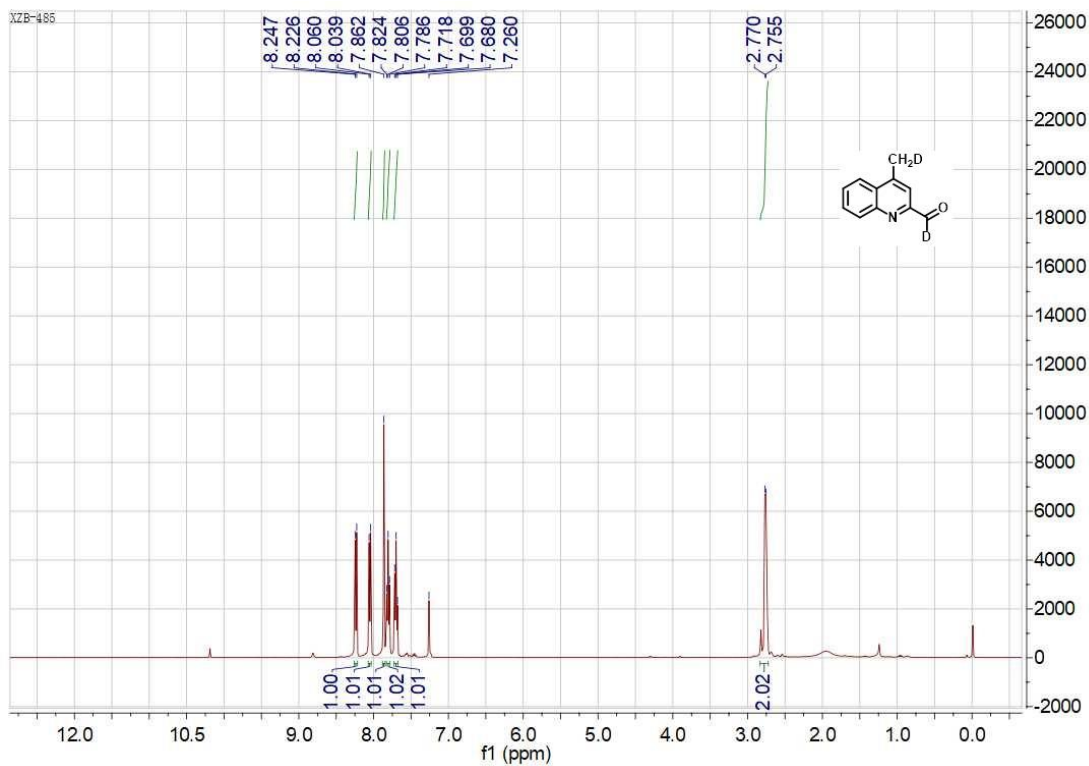

## 24-<sup>13</sup>C NMR

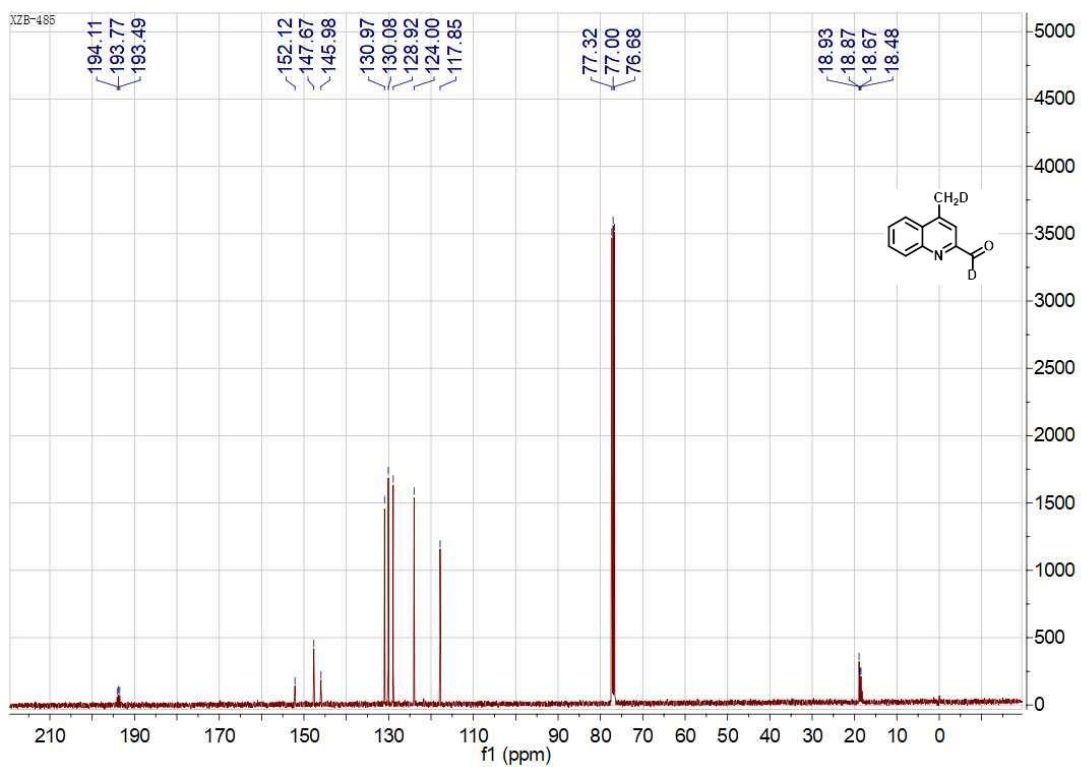

## 25-<sup>1</sup>H NMR

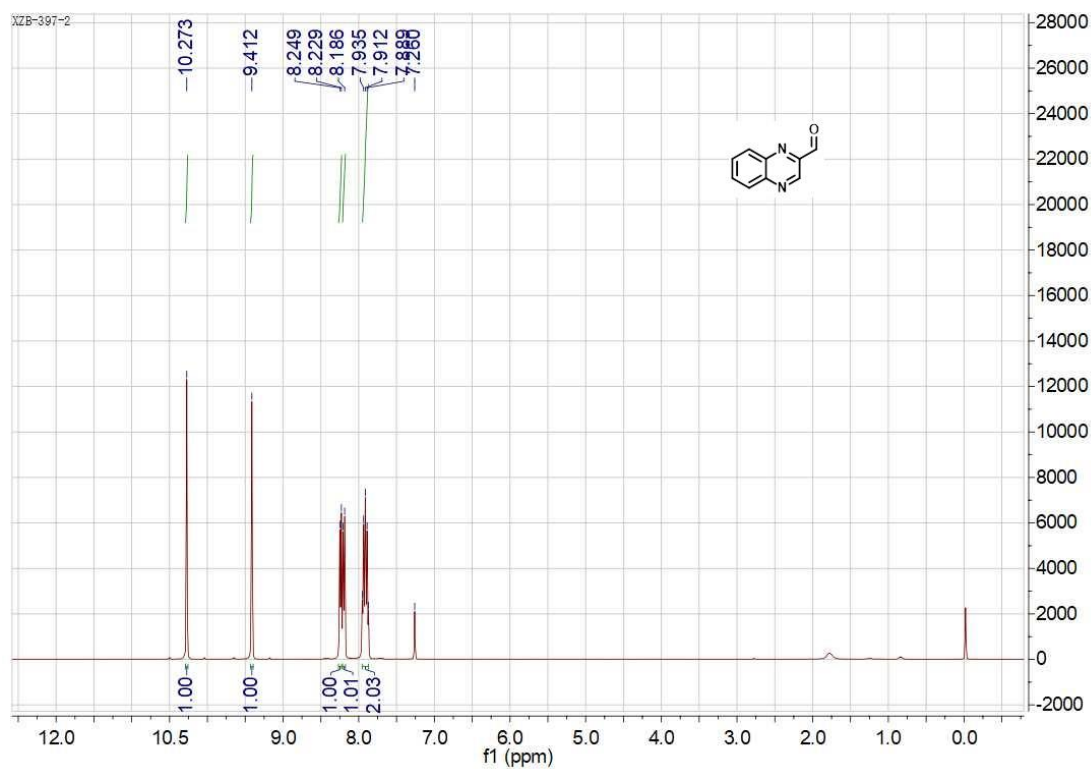

## 25-<sup>13</sup>C NMR

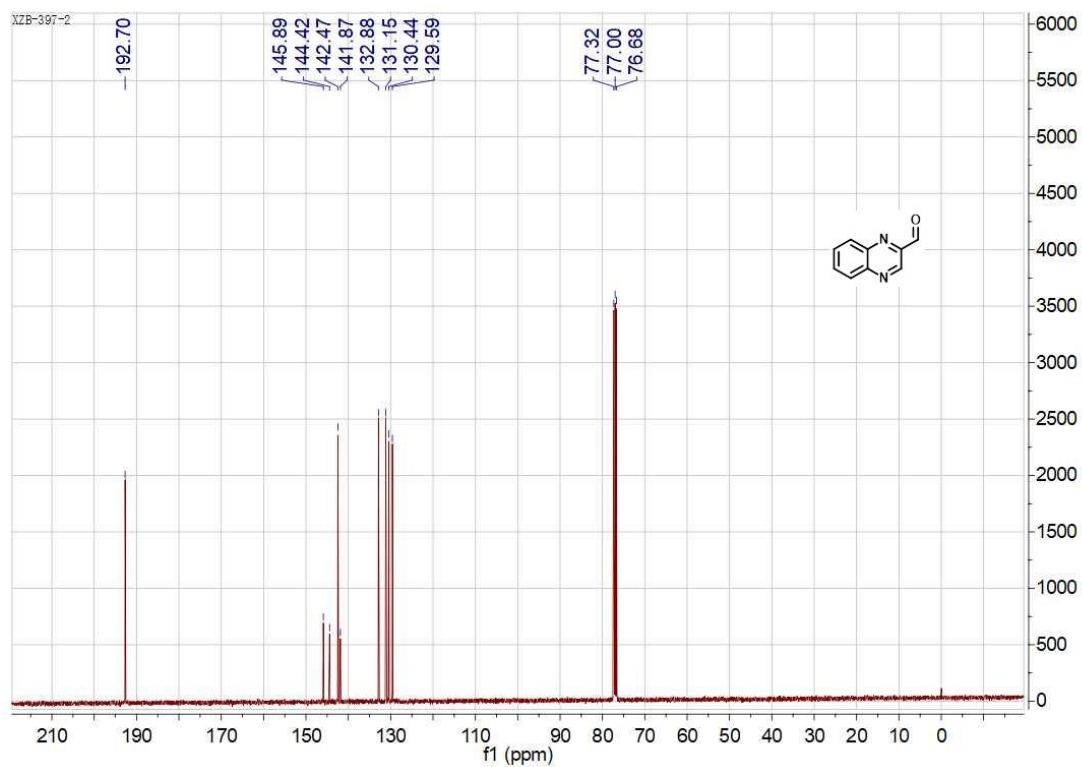

## 26-<sup>1</sup>H NMR

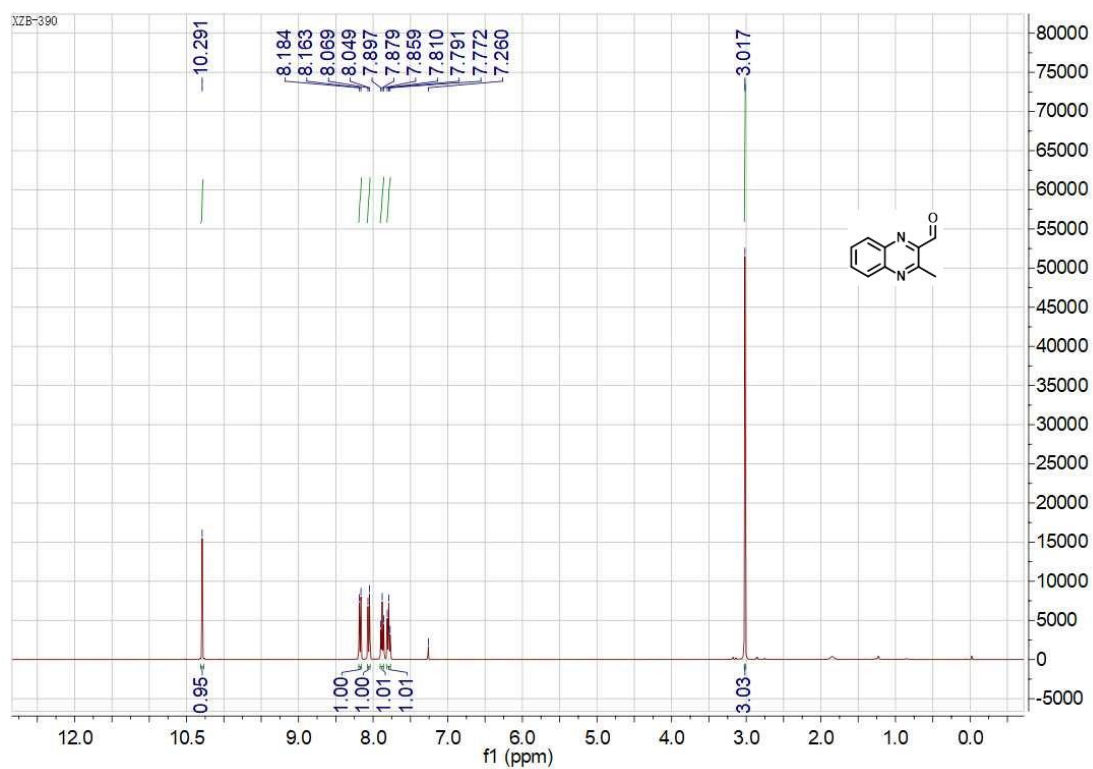

## 26-<sup>13</sup>C NMR

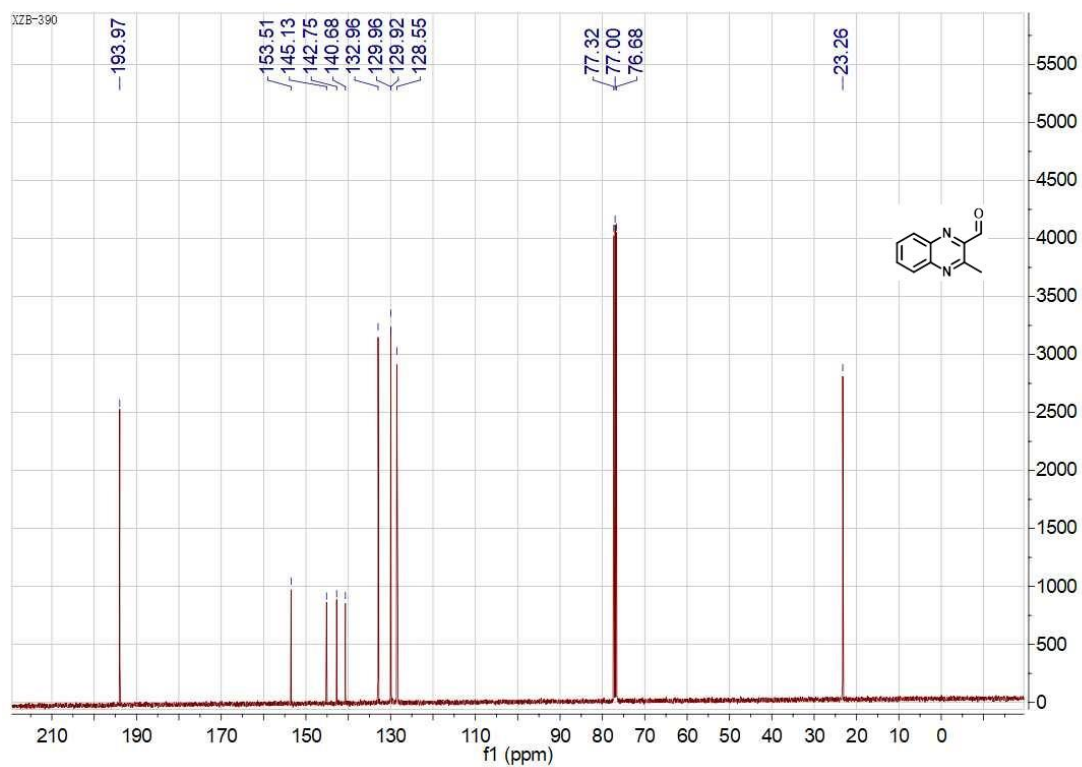

## 27-<sup>1</sup>H NMR

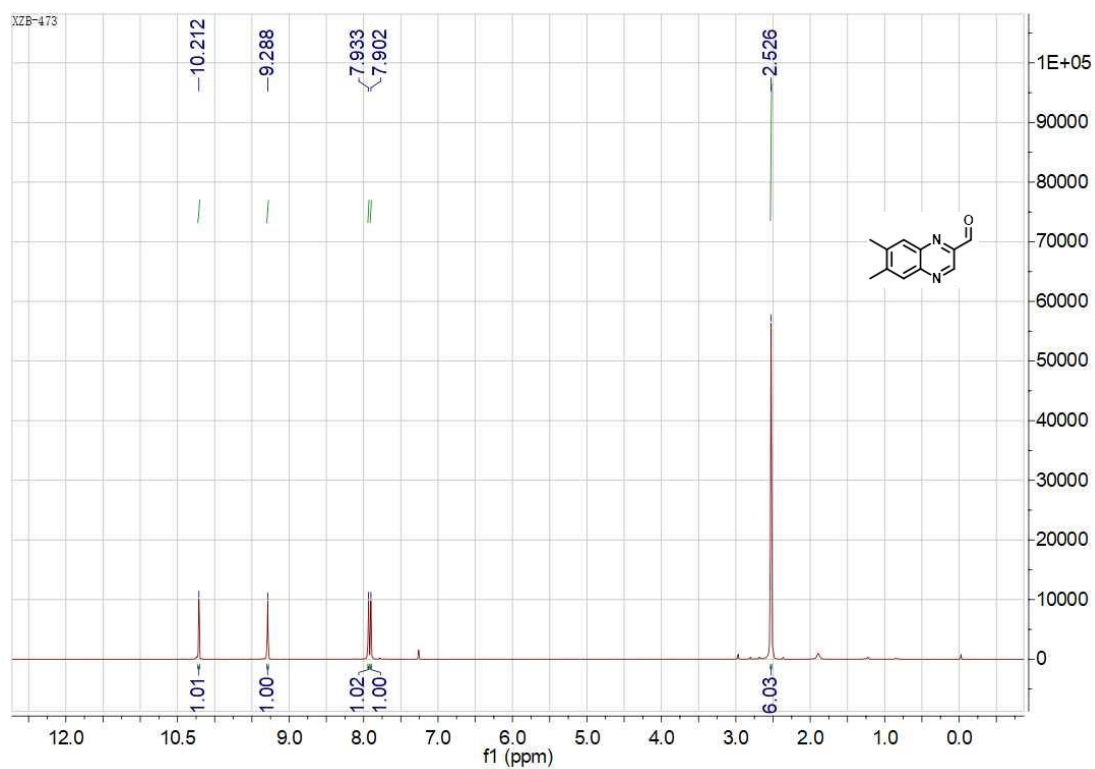

## 27-<sup>13</sup>C NMR

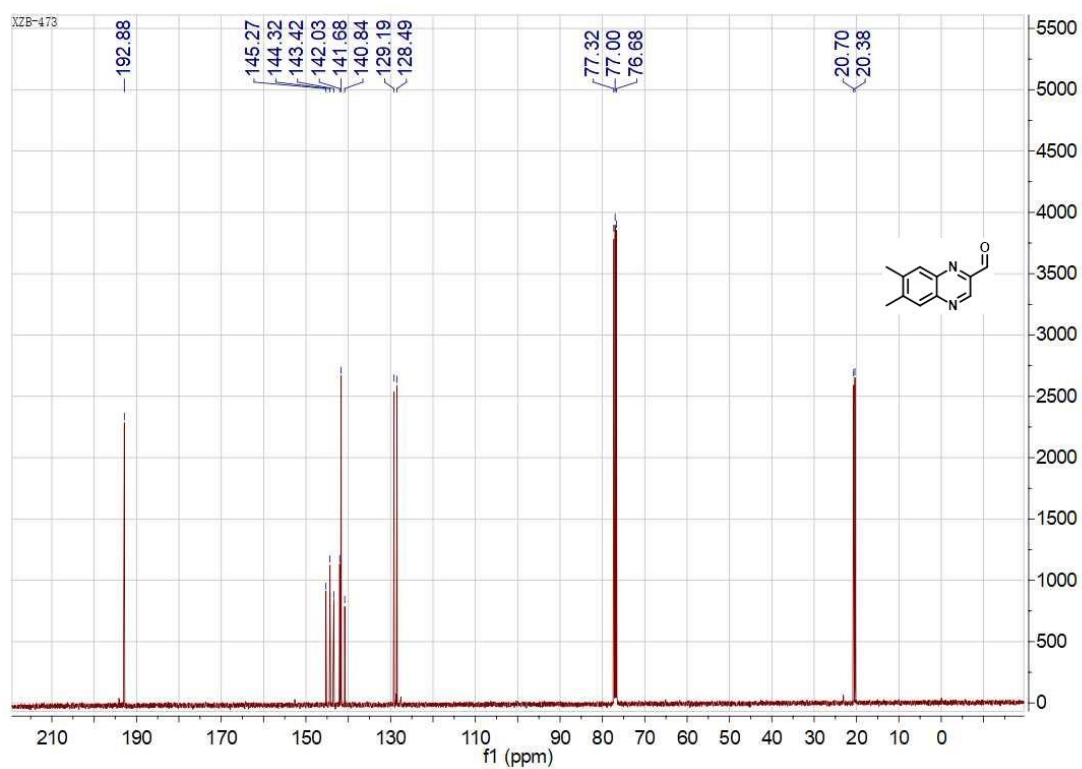



## 28-<sup>1</sup>H NMR

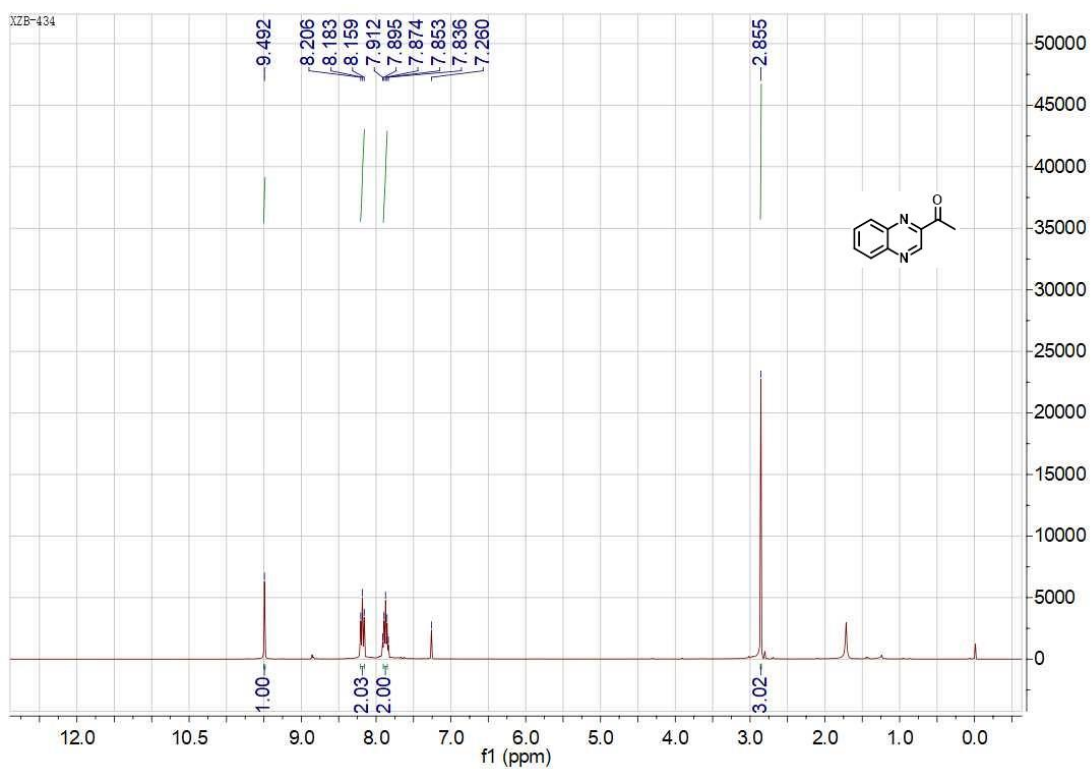

## 28-<sup>13</sup>C NMR

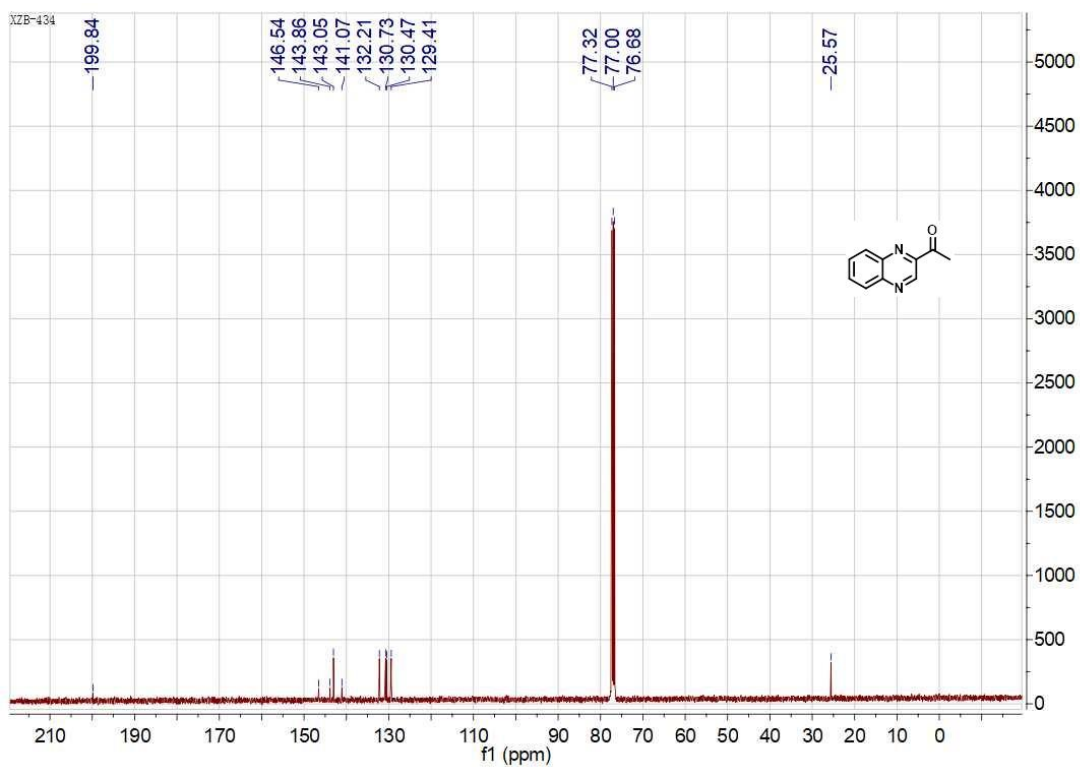

Supplement: d1ob01807h1.pdf [file d1ob01807h1.pdf]
